## Embodiment is related to better performance on an immersive brain computer interface in head-mounted virtual reality: A pilot study

1 **Julia M Juliano<sup>1</sup>, Ryan P Spicer<sup>2</sup>, Athanasios Vourvopoulos<sup>3</sup>, Stephanie Lefebvre<sup>3</sup>, Kay Jann<sup>4</sup>,**  
2 **Tyler Ard<sup>4</sup>, Emiliano Santarnecchi<sup>5</sup>, David M Krum<sup>2</sup>, Sook-Lei Liew<sup>3,4\*</sup>**

3 <sup>1</sup>Neural Plasticity and Neurorehabilitation Laboratory, Neuroscience Graduate Program, University  
4 of Southern California, Los Angeles, CA, USA

5 <sup>2</sup>Institute for Creative Technologies, University of Southern California, Los Angeles, CA, USA

6 <sup>3</sup>Neural Plasticity and Neurorehabilitation Laboratory, Division of Occupational Science and  
7 Occupational Therapy, University of Southern California, Los Angeles, CA, USA

8 <sup>4</sup>Stevens Neuroimaging and Informatics Institute, Department of Neurology, University of Southern  
9 California, Los Angeles, CA, USA

10 <sup>5</sup>Berenson-Allen Center for Non-Invasive Brain Stimulation and Division of Cognitive Neurology,  
11 Beth Israel Deaconess Medical Center, Harvard Medical School, Boston, MA, USA

### 12 **\*Correspondence:**

13 Sook-Lei Liew, PhD, OTR/L  
14 University of Southern California  
15 2025 Zonal Ave.  
16 Los Angeles, CA 90033  
17 Phone: 323.865.1755  
18 Email: sliew@usc.edu

19 **Keywords:** brain-computer interface, neurofeedback, head-mounted virtual reality,  
20 electroencephalography, embodiment, presence.

21

### 22 **Abstract**

23 Brain computer interfaces (BCI) can be used to provide individuals with neurofeedback of their own  
24 brain activity and train them to learn how to control their brain activity. Neurofeedback-based BCIs  
25 used for motor rehabilitation aim to ‘close the loop’ between attempted motor commands and sensory  
26 feedback by providing supplemental sensory information when individuals successfully establish  
27 specific brain patterns. Existing neurofeedback-based BCIs have used a variety of displays to provide  
28 feedback, ranging from devices that provide a more immersive and compelling experience (e.g.,  
29 head-mounted virtual reality (HMD-VR) or CAVE systems) to devices that are considered less  
30 immersive (e.g., computer screens). However, it is not clear whether more immersive systems (i.e.,  
31 HMD-VR) improve neurofeedback performance compared to computer screens, and whether there  
32 are individual performance differences in HMD-VR versus screen-based neurofeedback. In this pilot  
33 experiment, we compared neurofeedback performance in HMD-VR versus on a computer screen in  
34 twelve healthy individuals. We also examined whether individual differences in presence or  
35 embodiment correlated with neurofeedback performance in either environment. Participants were  
36 asked to control a virtual right arm by imagining right hand movements. Real-time brain activity  
37 indicating motor imagery, which was measured via electroencephalography (EEG) as desynchronized

38 sensorimotor rhythms (SMR; 8-24 Hz) in the left motor cortex, drove the movement of the virtual  
39 arm towards (increased SMR desynchronization) or away from (decreased SMR desynchronization)  
40 targets. Participants performed two blocks of 30 trials, one for each condition (Screen, HMD-VR),  
41 with the order of conditions counterbalanced across participants. After completing each block,  
42 participants were asked questions relating to their sense of presence and embodiment in each  
43 environment. We found that, while participants' performance on the neurofeedback-based BCI task  
44 was similar between conditions, the participants' reported levels of embodiment was significantly  
45 different between conditions. Specifically, participants experienced higher levels of embodiment in  
46 HMD-VR compared to the computer screen. We further found that reported levels of embodiment  
47 positively correlated with neurofeedback performance only in the HMD-VR condition. Overall, these  
48 preliminary results suggest that embodiment may improve performance on a neurofeedback-based  
49 BCI and that HMD-VR may increase embodiment during a neurofeedback-based BCI task compared  
50 to a standard computer screen.

51

## 52 **1 Introduction**

53 Neurofeedback training produces beneficial changes in motor function and has been shown to be  
54 successful in motor rehabilitation for clinical populations, such as individuals with stroke (Ramos-  
55 Murguialday et al., 2013). Neurofeedback-based brain computer interfaces (BCI) use sensory  
56 feedback to reward specific patterns of activity in the brain (e.g., as measured with  
57 electroencephalography (EEG)). This feedback is then used to control a robotic or computerized  
58 device (e.g., movement of an object on a computer screen) to train individuals to control their own  
59 brain activity. BCIs designed for the rehabilitation of individuals with severe motor impairment  
60 attempt to 'close the loop' between motor commands and sensory feedback by providing  
61 supplemental sensory information when individuals successfully establish specific brain patterns.

62 Given that individuals with severe motor impairment cannot generate active volitional  
63 movement, a primary neurofeedback approach is to use imagined movement (i.e., motor imagery) to  
64 drive the BCI. Motor imagery (MI) is thought to engage areas that modulate movement execution  
65 (Dechent et al., 2004; Jackson et al., 2003; Naito et al., 2002). MI has been shown to be an effective  
66 intervention for motor rehabilitation, especially when it is coupled with physical practice (Carrasco  
67 and Cantalapedra, 2016; Guerra et al., 2018). Another related approach is to use action observation.  
68 The action observation network (AON) consists of motor-related regions in the brain that are active  
69 during both the performance of an action and, more importantly, simply during the observation of an  
70 action. In this way, action observation provides a feasible way to stimulate cortical motor regions in  
71 the absence of volitional movement (Garrison et al., 2010, 2013). Related, action observation  
72 therapy, in which patients observe actions that correspond to their paretic limb, has been shown to  
73 improve motor rehabilitation in individuals with severe motor impairments (Franceschini et al., 2012;  
74 Zhu et al., 2015).

75 Previous work has shown that neurofeedback-based BCIs employing MI can produce clinically  
76 meaningful improvements in motor function in individuals with motor impairments (Ang et al., 2014;  
77 Biasucci et al., 2018; Cincotti et al., 2012; Frolov et al., 2017; Pichiorri et al., 2015; Tung et al.,  
78 2013). These neurofeedback-based BCIs have used a variety of displays to provide feedback, ranging  
79 from devices that provide an immersive and compelling experience (e.g., projected limbs, robotic  
80 orthoses, or exoskeletons; Cincotti et al., 2012; Frolov et al., 2017; Pichiorri et al., 2015; Ramos-  
81 Murguialday et al., 2013) to devices that are considered less immersive (e.g., computer screens; Ang

82 et al., 2014; Tung et al., 2013). Recently, BCIs have also begun to incorporate head-mounted virtual  
83 reality (HMD-VR) in order to provide a more immersive and realistic environment (McMahon and  
84 Schukat, 2018) and to provide more biologically relevant feedback (Vourvopoulos and Bermúdez i  
85 Badia, 2016). However, it is not known whether HMD-VR improves neurofeedback performance  
86 compared to feedback provided on a screen. It is also unclear whether neurofeedback provided in  
87 HMD-VR increases one's feeling of presence and embodiment compared to screen-based  
88 neurofeedback.

89 Studies have shown that HMD-VR facilitates the embodiment of a virtual body and that the  
90 observation of this virtual body in the first person perspective is enough to induce a strong feeling of  
91 embodiment for the virtual body's actions (Banakou et al., 2013; Kiltner et al., 2012, 2013; Osimo et  
92 al., 2015; Yee and Bailenson, 2007). In HMD-VR, individuals exhibit behaviors that match those of a  
93 digital self-representation, such as overestimating object sizes when an adult has been given a virtual  
94 child body (Banakou et al., 2013) or exhibiting a reduction in implicit racial bias when given a body  
95 of a different race (Banakou et al., 2016). Initially coined the Proteus Effect (Yee and Bailenson,  
96 2007), this sense of embodiment that arises from viewing a virtual limb has the potential to alter  
97 one's own neurophysiology and behavior. Regarding motor behavior, an increased level of presence  
98 and embodiment has been shown to be related to increased sensorimotor rhythms (SMR)  
99 desynchronization (Vecchiato et al., 2015). Related, observing the actions of virtual limbs in virtual  
100 reality have been shown to increase SMR desynchronization (Pavone et al., 2016).

101 We have created a hybrid brain computer interface for individuals with severe motor  
102 impairments called REINVENT (Rehabilitation Environment using the Integration of  
103 Neuromuscular-based Virtual Enhancements for Neural Training), which can take brain (EEG)  
104 and/or muscle (electromyography (EMG)) signals indicating an attempt to move and provide  
105 neurofeedback of an individual's virtual arm moving in head-mounted virtual reality (HMD-VR). In  
106 this way, elements of motor imagery, action observation, and neurofeedback are combined in one  
107 platform.

108 Although we designed REINVENT as a neurofeedback-based BCI device for individuals with  
109 severe motor impairments, in this pilot study, we first wanted to examine whether providing  
110 neurofeedback in HMD-VR improves neurofeedback performance compared to receiving the same  
111 neurofeedback on a computer screen in healthy adults. Furthermore, we wanted to examine whether  
112 there were differences in the levels of presence and embodiment induced by HMD-VR versus a  
113 computer screen, and how individual differences in these features relate to neurofeedback  
114 performance in each environment. As presence and embodiment play an important role in increasing  
115 SMR desynchronization and HMD-VR induces high levels of presence and embodiment, we  
116 predicted that participants would show better neurofeedback performance in an HMD-VR  
117 environment compared to a computer screen, and that improved performance would be related to  
118 increased presence and embodiment.

119

## 120 **2 Materials and Methods**

### 121 **2.1 Participants**

122 Twelve healthy participants were recruited for this experiment (7 females/ 5 males; age:  $M = 24.4$   
123 years,  $SD = 2.7$  years). Eligibility criteria included healthy, right handed individuals and informed  
124 consent was obtained from all participants. Eight participants reported being naive to head mounted

125 virtual reality; the four participants with previous use of head mounted virtual reality reported using  
126 the device no more than four times. The experimental protocol was approved by the University of  
127 Southern California Health Sciences Campus Institutional Review Board and performed in  
128 accordance with the 1964 Declaration of Helsinki.

## 129 **2.2 REINVENT hardware, software, online processing, and data integration**

130 The REINVENT system is described in technical detail in a previously published paper (Spicer et al.,  
131 2017). Briefly, REINVENT (Figure 1A) is a brain computer interface (BCI) that is composed of four  
132 main components: electroencephalography (EEG), electromyography (EMG), an inertial  
133 measurement unit (IMU), and a head-mounted virtual reality (HMD-VR) system. Custom software is  
134 used to control the BCI and provide users with real-time feedback of a virtual arm. EEG signals were  
135 recorded from electrodes of interest over the left motor cortex (i.e., C1, C3, and CP1, based on the  
136 international 10-20 system) with both ear lobes used as the ground and reference electrodes, and sent  
137 to the REINVENT software. Data processing occurred online. Individual channels were high-pass  
138 filtered using a second order Butterworth filter with a cutoff of 3 Hz, and a sliding window consisting  
139 of 125 incoming samples were fast Fourier transformed (FFT). Power was then computed between  
140 the frequency ranges of 8-24 Hz, capturing the broad activity in alpha and beta bands that may  
141 correspond to motor imagery (i.e., sensorimotor desynchronization). The virtual arm direction  
142 updated every second and moved towards the target in response to sensorimotor desynchronization,  
143 measured as a decrease in amplitude compared to the baseline recording of the left sensorimotor area  
144 (i.e., the combined three channels: C1, C3, CP1).

### 145 **2.2.1 Electroencephalography (EEG) and electromyography (EMG)**

146 The EEG/EMG component of REINVENT is composed of hardware from OpenBCI  
147 ([www.openbci.com](http://www.openbci.com)), a low-cost solution for measuring brain and muscle activity. The EEG  
148 component consists of reusable dry EEG electrodes and the EMG component consists of snap  
149 electrode cables connected to mini disposable gel electrodes (Davis Medical Electronics, Inc.). Both  
150 EEG and EMG wires were connected to a 16-channel, 32-bit v3 processor (Cyton + Daisy  
151 Biosensing OpenBCI Board) and sampled at 125 Hz.

152 Twelve EEG locations based on the international 10-20 system and concentrated over the  
153 prefrontal and motor cortex were used to record brain activity (F3, F4, C1, C2, C3, C4, CP1, CP2,  
154 CP5, CP6, P3, and P4). Ground and reference electrodes were located at the right and left earlobes,  
155 respectively. For the neurofeedback, the sum desynchronization from C1, C3 and CP1, representing  
156 the left motor network, was used to drive the movement of a virtual right arm towards a target arm.  
157 EMG was recorded from four electrodes placed on the wrist flexors and extensors on the muscle  
158 bellies of the right forearm, with a reference electrode on the bony prominence of the elbow. In the  
159 current experiment, muscle activity from EMG was collected but not analyzed or reported.

### 160 **2.2.2 Arm movement**

161 To foster a sense of embodiment between the participant and the virtual arm, the participant's own  
162 arm movements were recorded using two Nine Degrees of Freedom (9DOF) IMUs, with one placed  
163 on the hand and the other placed on the wrist of the right arm (Spicer et al., 2017). Before beginning  
164 the experiment, the participant's arm was passively moved by the experimenter and the virtual  
165 representation of the arm was shown on the computer screen and in HMD-VR. In this way, a  
166 sensorimotor contingency was developed between the participant's own arm and the virtual arm they  
167 were subsequently asked to control.

## 168 **2.3 Displays**

169 For the HMD-VR condition, we used the Oculus CV1 which includes positional and rotational  
170 tracking to display the stimuli. For the Screen condition, we used a 24.1 inch, 1920 × 1200 pixel  
171 resolution computer monitor (Hewlett-Packard) to display the stimuli. In both displays, participants  
172 observed a scene that included two virtual arms: (1) one virtual arm that represented the participant's  
173 own arm and (2) a second virtual arm, colored in orange, that provided different target arm positions  
174 that participants were asked to move their own arm towards (Figure 1B).

## 175 **2.4 Experimental design**

176 All participants underwent the same experimental design and completed all conditions (Screen,  
177 HMD-VR). Prior to the experiment, a resting EEG baseline of three minutes with the HMD-VR  
178 removed was recorded for each participant. Participants were instructed to keep their eyes open and  
179 fixed on a location at the center of the computer screen. For the duration of the recording, participants  
180 were asked to think about a stationary object and to stay as still as possible. The recording was used  
181 to provide the baseline EEG values for the experiment. Participants then completed three blocks of  
182 30 trials (90 trials in total) where each block was a separate condition. The conditions were (1)  
183 controlling the virtual arm with brain activity on the computer screen (Screen), (2) controlling the  
184 virtual arm with brain activity in head-mounted virtual reality (HMD-VR), and (3) controlling the  
185 virtual arm with actual arm movements in head-mounted virtual reality (IMU). Participants  
186 completed the conditions in the following block order: Block 1 (Screen), Block 2 (HMD-VR), Block  
187 3 (IMU), with the first two blocks (Screen, HMD-VR) counterbalanced. In this experiment, the IMU  
188 condition strictly provided a control condition of real movement instead of neurofeedback; this data  
189 is briefly reported but not focused on in this paper. Before starting the experimental conditions,  
190 participants were given instructions on how to control their virtual arm (i.e., “You will see two right  
191 arms. One is orange and that is the target arm that moves to different positions. The other is your  
192 arm. We want you to move it to match the target arm's position. You can move your arm in two  
193 ways. First, you will complete 60 trials of moving the virtual arm with just your thoughts by thinking  
194 about moving; 30 of the trials will be on the computer screen, without the head-mounted virtual  
195 reality, and 30 trials will be with the head-mounted virtual reality. Then you will complete 30 trials  
196 of moving the virtual arm using your actual arm movements.”). Instructions were repeated at the start  
197 of each condition. After the completion of each EEG neurofeedback condition (Screen, HMD-VR), a  
198 resting-EEG acquisition of three minutes was recorded while the HMD-VR was removed;  
199 participants were again instructed to keep their eyes open and fixed on the center of the screen for the  
200 duration of the recording. Figure 2 shows a detailed timeline of the experimental design.

### 201 **2.4.1 Individual trials**

202 At the start of each trial, a target arm animated a wrist extension pose in one of three target positions.  
203 Once the target arm stopped moving, participants were instructed to move their virtual arm to match  
204 the position of the target arm given the current condition (i.e., in the case of the two EEG  
205 neurofeedback conditions (Screen, HMD-VR), they were asked to think about moving; in the case of  
206 the IMU condition, they were asked to actually move their arm to the target location). During the  
207 EEG neurofeedback condition trials, the virtual hand incremented either forward or backward, as  
208 determined by the sum of the three channel EEG desynchronization compared to baseline. Most of  
209 the time, the EEG activity was significantly above or below the baseline; however, if the  
210 sensorimotor activity was hovering around the baseline, the arm would move back and forth. The  
211 duration of each trial was 15 seconds; if the target arm was reached within this time constraint, a  
212 successful auditory tone was played, however, if the target arm was not reached, then an unsuccessful



213 auditory tone was played. At the completion of each trial, the target and virtual arms returned to their  
214 starting position.

## 215 **2.5 Subjective Questionnaires**

216 Prior to the experiment, participants were given a series of standard questions about their baseline  
217 comfort levels (Simulator Sickness Questionnaire; adapted from Kennedy et al. 1993). After  
218 participants completed each EEG neurofeedback condition (Screen, HMD-VR), they were given the  
219 same simulator sickness questionnaire to examine changes following each block. Responses were  
220 reported on a 0 to 3-point scale and questions were collapsed along three main features: Nausea,  
221 Oculomotor, and Disorientation. In addition, after completing both the Screen and HMD-VR  
222 conditions, participants were also asked questions pertaining to their overall sense of presence and  
223 embodiment in each respective environment. The Presence Questionnaire was adapted from Witmer  
224 and Singer (1998) and revised by the UQO Cyberpsychology Lab (2004) and asked participants a  
225 series of questions to gauge their sense of presence in each environment. Responses were reported on  
226 a 1 to 7-point scale and questions were collapsed along five main features: Realism, Possibility to  
227 Act, Quality of Interface, Possibility to Examine, and Self-Evaluation of Performance. The  
228 Embodiment Questionnaire was adapted from Bailey et al. (2016) and Banakou et al. (2013) and  
229 asked participants a series of questions to gauge their sense of embodiment. Responses were reported  
230 on a 1 to 10-point scale and questions were averaged to generate an overall Embodiment feature. In  
231 addition, we also collapsed questions relating to either Self Embodiment or Spatial Embodiment to  
232 generate two embodiment sub-features. Table 1 includes individual questions asked on the  
233 Embodiment Questionnaire.

## 234 **2.6 Analyses**

### 235 **2.6.1 Post-hoc EEG analysis on activity during task**

236 In addition to the online processing (see section 2.2), post-hoc EEG signals were processed offline  
237 using MATLAB® (R2017a, The MathWorks, MA, USA) with the EEGLAB toolbox (Delorme and  
238 Makeig, 2004). After importing the data and channel information, a high-pass filter at 1 Hz was  
239 applied to remove the 'baseline drift' followed by line-noise and harmonics removal at 60 Hz.  
240 Furthermore, bad channels were rejected while any potential missing channels were interpolated  
241 before the re-referencing stage. Additionally, all channels were re-referenced to the average. Next,  
242 data epoching was performed by extracting the trials from the EEG neurofeedback conditions  
243 (Screen, HMD-VR) for each participant. Finally, the baseline data (180 seconds) were extracted from  
244 the resting-state session that occurred before the task.

245 For computing the average spectral power, Welch's method for Power Spectral Density  
246 (PSD) of the power spectrum (Welch, 1967) was used across the online frequency range (8-24 Hz)  
247 and for the alpha (8-12 Hz) and beta (13-24 Hz) bands. PSD was extracted from both the epoched  
248 motor-related data and the baseline. Finally, the band power was extracted over the C3 electrode  
249 location and calculated using the following formula:

$$250 \quad \text{PSD}_{\text{Band}} = \text{Power}_{\text{C3 Motor Activity}} - \text{Power}_{\text{C3 Baseline}}$$

### 251 **2.6.2 Statistical Analysis**

252 Statistical analysis for neurofeedback performance, subjective experience from questionnaires, and  
253 EEG activity during the task was analyzed using the statistical package R (3.2.2, The R Foundation  
254 for Statistical Computing, Vienna, Austria). To assess statistical differences in performance,

255 subjective experience, and average spectral power during the task between the two EEG conditions  
256 (Screen, HMD-VR), a paired t-test was performed on each measure. Means (M) and standard  
257 deviations (SD) are reported for each measure. To confirm that neurofeedback based on motor  
258 imagery was successfully used to increase performance, we ran a simple linear regression on  
259 neurofeedback performance based on PSD. Lastly, we examined the relationship between  
260 neurofeedback performance and responses from the Presence Questionnaire and the Embodiment  
261 Questionnaire using regression analysis. For the Presence Questionnaire, we ran a multiple regression  
262 analysis on neurofeedback performance based on the five presence features for each condition  
263 (Screen, HMD-VR). For the Embodiment Questionnaire, we first ran a simple linear regression  
264 analysis on neurofeedback performance based on the overall Embodiment feature for each condition.  
265 Then, we ran a multiple regression analysis on neurofeedback performance based on the two  
266 embodiment sub-features (Self Embodiment and Spatial Embodiment) for each condition. For all  
267 regression analyses, adjusted  $R^2$  is reported. All participants completed the IMU condition with  
268 100% accuracy and therefore this condition is not included in this analysis.

269

### 270 **3 Results**

#### 271 **3.1 Differences in neurofeedback performance and time to complete trials between Screen** 272 **and HMD-VR**

273 The proportion of correct trials completed was similar between the two conditions (Figure 3A;  $t(11)$   
274 = -0.46,  $p = 0.656$ ; Screen:  $M = 80.95\%$ ,  $SD = 9.1\%$ , and HMD-VR:  $M = 83.33\%$ ,  $SD = 14.9\%$ ).  
275 These results suggest that participants seemed to perform similarly independent of whether  
276 neurofeedback was provided in HMD-VR or on a computer screen.

277 Similarly, the time to complete each of the successful trials was also similar between the two  
278 conditions (Figure 3B;  $t(11) = 0.54$ ,  $p = 0.597$ ; Screen:  $M = 4.347$  s,  $SD = 1.17$  s, and HMD-VR:  $M =$   
279  $3.996$  s,  $SD = 2.41$  s). These results suggest that when participants were able to increment the virtual  
280 arm towards the target with their brain activity, the efficiency of control was similar whether viewing  
281 the arm in the HMD-VR environment or on a computer screen.

#### 282 **3.2 Differences in power spectral density between Screen and HMD-VR**

283 Similar to the neurofeedback performance results, we did not find significant differences in group-  
284 level PSD between the Screen and HMD-VR conditions across the 8-24 Hz frequency range (Figure  
285 4A;  $t(11) = 0.475$ ,  $p = 0.644$ ; Screen:  $M = -4.69$ ,  $SD = 2.96$ , and HMD-VR:  $M = -4.32$ ,  $SD = 3.41$ ).  
286 We also explored alpha and beta bands separately, and did not find significant differences in group-  
287 level PSD between the Screen and HMD-VR conditions in either band (alpha: Figure 4B,  $t(11) =$   
288  $1.363$ ,  $p = 0.200$ , Screen:  $M = -1.84$ ,  $SD = 2.90$ , and HMD-VR:  $M = -2.89$ ,  $SD = 3.04$ ; beta: Figure  
289 4C,  $t(11) = -1.141$ ,  $p = 0.278$ , Screen:  $M = -5.88$ ,  $SD = 3.08$ , and HMD-VR:  $M = -4.92$ ,  $SD = 3.63$ ).  
290 This further suggests that participants had similar levels of sensorimotor activity whether  
291 neurofeedback was provided in HMD-VR or on a computer screen. Additionally, we have included  
292 two supplementary figures reporting individual participant EEG activity in alpha and beta bands for  
293 both C3 (Supplementary Figure 1; contralateral to and controlling of the virtual hand) and C4  
294 (Supplementary Figure 2; ipsilateral to the virtual hand) recordings.

#### 295 **3.3 Relationship between power spectral density and neurofeedback performance**

296 To confirm the relationship between PSD in the 8-24 Hz frequency range and the corresponding  
297 neurofeedback performance, we ran a simple linear regression of neurofeedback performance based  
298 on PSD. As expected, we found a significant relationship between PSD and neurofeedback  
299 performance (Figure 5;  $F(1,22) = 9.328$ ,  $p = 0.006$ ;  $R^2 = 0.266$ ) where an increased sensorimotor  
300 desynchronization corresponded to better neurofeedback performance.

### 301 **3.4 Differences in subjective experience between Screen and HMD-VR**

302 There was a significant difference in reports of embodiment between the two conditions ( $t(11) = -$   
303  $2.21$ ,  $p = 0.049$ ; Screen:  $M = 4.68$ ,  $SD = 1.27$ , and HMD-VR:  $M = 5.4$ ,  $SD = 1.71$ ) where individuals  
304 reported higher levels of Embodiment in the HMD-VR condition. We then examined the sub-features  
305 of embodiment, and found a significant difference in reports of spatial embodiment between the two  
306 conditions ( $t(11) = -3.77$ ,  $p = 0.003$ ; Screen:  $M = 3.60$ ,  $SD = 2.04$ , and HMD-VR:  $M = 5.35$ ,  $SD =$   
307  $2.00$ ) where individuals reported higher levels of Spatial Embodiment in the HMD-VR condition.  
308 However, there was no significant difference in reports of self embodiment between the two  
309 conditions ( $t(11) = -0.10$ ,  $p = 0.922$ ; Screen:  $M = 5.39$ ,  $SD = 1.17$ , and HMD-VR:  $M = 5.43$ ,  $SD =$   
310  $1.76$ ). These results suggest that neurofeedback presented in HMD-VR increases one's feeling of  
311 embodiment compared to neurofeedback presented on a computer screen.

312 In contrast, there were no significant differences in reports of simulator sickness between the  
313 Screen (Nausea:  $M = 1.59$ ,  $SD = 8.94$ ; Oculomotor:  $M = 9.48$ ,  $SD = 12.15$ ; Disorientation:  $M = 4.64$ ,  
314  $SD = 17.13$ ) and the HMD-VR (Nausea:  $M = 2.39$ ,  $SD = 5.93$ ; Oculomotor:  $M = 9.45$ ,  $SD = 9.76$ ;  
315 Disorientation:  $M = 3.48$ ,  $SD = 8.65$ ) conditions (Nausea:  $t(11) = -0.56$ ,  $p = 0.586$ ; Oculomotor:  $t(11)$   
316  $= 0.00$ ,  $p = 1.00$ ; Disorientation:  $t(11) = 0.43$ ,  $p = 0.674$ ). These results suggest that HMD-VR  
317 neurofeedback does not cause additional adverse effects beyond using a computer screen in healthy  
318 individuals.

319 In addition, there were no significant differences between reports of presence in the two  
320 conditions (Realism:  $t(11) = -1.95$ ,  $p = 0.078$ , Screen:  $M = 30.00$ ,  $SD = 6.35$ , HMD-VR:  $M = 33.00$ ,  
321  $SD = 6.40$ ; Possibility to Act:  $t(11) = -1.37$ ,  $p = 0.199$ , Screen:  $M = 18.17$ ,  $SD = 3.70$ , HMD-VR:  $M$   
322  $= 19.92$ ,  $SD = 4.19$ ; Quality of Interface:  $t(11) = -0.62$ ,  $p = 0.548$ , Screen:  $M = 12.83$ ,  $SD = 3.07$ ,  
323 HMD-VR:  $M = 13.42$ ,  $SD = 2.97$ ; Possibility to Examine:  $t(11) = -2.01$ ,  $p = 0.070$ , Screen:  $M =$   
324  $13.17$ ,  $SD = 2.59$ , HMD-VR:  $M = 14.92$ ,  $SD = 2.27$ ; Self-Evaluation of Performance:  $t(11) = -1.24$ ,  $p$   
325  $= 0.241$ , Screen:  $M = 10.0$ ,  $SD = 1.95$ , HMD-VR:  $M = 11.00$ ,  $SD = 2.13$ ). This suggests that HMD-  
326 VR neurofeedback may specifically increase embodiment but not presence in healthy individuals.

### 327 **3.5 Relationship between embodiment, presence, and neurofeedback performance**

328 We next examined whether individual differences in embodiment related to neurofeedback  
329 performance for each condition. We ran a simple linear regression of neurofeedback performance  
330 based on the overall Embodiment feature. For the HMD-VR condition, we found a significant  
331 relationship between embodiment and neurofeedback performance ( $F(1,10) = 8.293$ ,  $p = 0.016$ ;  $R^2 =$   
332  $0.399$ ). However, for the Screen condition, we did not find a significant relationship between  
333 embodiment and neurofeedback performance ( $F(1,10) = 0.434$ ,  $p = 0.525$ ;  $R^2 = -0.054$ ). These results  
334 suggest that level of embodiment is specifically related to neurofeedback performance only in HMD-  
335 VR and not on a computer screen (Figure 6A; yellow regression line).

336 To better understand whether specific sub-features of embodiment also related to  
337 neurofeedback performance, we then examined if participants' levels of self and spatial embodiment  
338 related to their neurofeedback performance for each condition (Screen, HMD-VR). We ran a multiple



339 linear regression of neurofeedback performance based on the two embodiment sub-features (i.e., Self  
340 Embodiment, Spatial Embodiment). For the HMD-VR condition, we found a near significant  
341 relationship between the two embodiment sub-features and neurofeedback performance ( $F(2,9) =$   
342  $3.858, p = 0.0617; R^2 = 0.342$ ). For the Screen condition, we did not find a significant relationship  
343 between the two embodiment sub-features and neurofeedback performance ( $F(2,9) = 0.706, p =$   
344  $0.519; R^2 = -0.056$ ). These results further suggest that level of embodiment is specifically related to  
345 HMD-VR neurofeedback performance. Figure 6B and 6C show regression lines for both Self  
346 Embodiment and Spatial Embodiment, respectively.

347 Although there were no differences in presence between the Screen and HMD-VR conditions,  
348 we also explored whether individual differences in presence related to neurofeedback performance  
349 for each condition (Screen, HMD-VR). We ran a multiple linear regression of neurofeedback  
350 performance based on the five presence features (i.e., Realism, Possibility to Act, Quality of  
351 Interface, Possibility to Examine, and Self-Evaluation of Performance). We did not find a significant  
352 relationship between the five presence features and neurofeedback performance for either the Screen  
353 or HMD-VR condition (HMD-VR: ( $F(5,6) = 0.476, p = 0.452; R^2 = 0.039$ ); Screen:  $F(5,6) = 0.840, p$   
354  $= 0.567; R^2 = -0.078$ ). These results suggest that the level of presence does not seem to be  
355 significantly related to either HMD-VR or computer screen neurofeedback performance.

356

## 357 **4 Discussion**

358 The current pilot study examined whether neurofeedback from a motor-related brain computer  
359 interface provided in HMD-VR could lead to better neurofeedback performance compared to the  
360 same feedback provided on a standard computer screen. In addition, differences in embodiment and  
361 presence between Screen and HMD-VR conditions were examined. Finally, we explored whether  
362 individual differences in embodiment and presence related to neurofeedback performance in each  
363 condition. Overall, we found preliminary evidence that healthy participants showed similar levels of  
364 neurofeedback performance in both Screen and HMD-VR conditions; however, we found a trend for  
365 better performance in the HMD-VR condition. Additionally, participants reported greater  
366 embodiment in the HMD-VR versus Screen condition, and higher reported levels of embodiment  
367 related to better neurofeedback performance in the HMD-VR condition only. These preliminary  
368 results suggest that HMD-VR-based neurofeedback may rely on an individual's sense of embodiment  
369 for successful performance. Future studies should explore these findings with a larger sample size  
370 over a longer period of time.

### 371 **4.1 Neurofeedback performance between a computer screen and HMD-VR**

372 Regardless of condition (Screen, HMD-VR), we found that on average, individuals were able to  
373 accurately modulate their brain activity to successfully control a virtual arm on over 80 percent of  
374 trials. These results suggest that neurofeedback based on motor imagery, using biologically-relevant  
375 stimuli, can occur either on a computer screen or in head-mounted virtual reality. However, as seen in  
376 Figures 3A and 3B, there is a trend towards better performance and faster time to complete a  
377 successful trial in the HMD-VR condition compared to the Screen condition, which may not allow  
378 for significance because of our limited dataset (further discussed in section 4.6). This trend towards  
379 greater sensorimotor desynchronization can also be observed in the individual subject data  
380 (Supplementary Figures 1 and 2), with more individuals showing more sensorimotor activity for the  
381 HMD-VR condition than the Screen condition. Additionally, there is a larger range of interindividual  
382 variability in both performance and average time to complete a successful trial in the HMD-VR

383 condition, suggesting that some individuals may benefit from HMD-VR compared to others. This  
384 suggestion is further supported by the correlation between performance and embodiment, in which  
385 we show that individuals who had greater embodiment had better performance in HMD-VR only  
386 (further discussed in section 4.4).

#### 387 **4.2 Power spectral density between a computer screen and HMD-VR**

388 Similarly, regardless of condition (Screen, HMD-VR), we found that on average, individuals had  
389 similar levels of sensorimotor activity, as measured by PSD between 8-24 Hz, and when divided into  
390 alpha and beta frequency bands. This was expected as the sensorimotor desynchronization used to  
391 calculate PSD was also used to drive the virtual arm in the task. However, similar to the performance  
392 results, we see a trend for greater desynchronization in the alpha band for the HMD-VR condition  
393 (Figure 4B). While we do not see a trend for greater desynchronization in the beta band for the  
394 HMD-VR condition (Figure 4C), these results may indicate a neurofeedback-based effect for the  
395 different displays, suggesting that feedback type may be able to alter brain activity. We also showed  
396 a significant relationship between PSD and neurofeedback performance, where increased  
397 desynchronization corresponded to increased performance.

#### 398 **4.3 A higher level of embodiment in HMD-VR compared to a computer screen**

399 After performing the neurofeedback task in each condition (Screen, HMD-VR), participants reported  
400 having higher levels of embodiment in HMD-VR compared to the computer screen. This is in  
401 agreement with previous research showing that HMD-VR is effective for inducing embodiment  
402 (Osimo et al., 2015; Slater and Sanchez-Vives, 2016). However, while it has been intuitively  
403 suggested that viewing a virtual body in HMD-VR should induce greater embodiment than viewing  
404 the same virtual body on a computer screen, to our knowledge, there has been little empirical  
405 evidence to demonstrate this. Here, we address this gap by providing evidence that HMD-VR does  
406 seem to in fact increase embodiment compared to a computer screen during a neurofeedback task.

#### 407 **4.4 Greater embodiment is related to better neurofeedback performance in HMD-VR**

408 In line with our hypothesis, we show that greater embodiment was positively related to better  
409 neurofeedback performance in HMD-VR. This uniqueness to HMD-VR could possibly be explained  
410 by an increased range of embodiment levels in the HMD-VR condition compared to the Screen  
411 condition. These results are consistent with previous research where embodiment has been shown to  
412 lead to neurophysiological and behavioral changes based on the virtual body's characteristics, such as  
413 overestimating object distances after given an elongated virtual arm in HMD-VR (Kilteni et al.,  
414 2012). While these findings do not support causality, they are important because they suggest that  
415 embodiment may have the potential to improve an individual's neurofeedback performance, and  
416 HMD-VR may be able to increase the level of embodiment of an individual, beyond that of a normal  
417 computer screen. This suggests that if individuals were to encounter a ceiling effect while controlling  
418 neurofeedback on a computer screen, they might be able to show greater improvements, beyond this  
419 ceiling, if they show greater embodiment in HMD-VR.

#### 420 **4.5 Future clinical implications**

421 We designed REINVENT as a neurofeedback-based BCI for individuals with severe motor  
422 impairments, such as stroke. However, before exploring the effectiveness of this device in a  
423 population with severe motor impairments, we first examined whether providing neurofeedback in  
424 HMD-VR improves performance compared to receiving the same neurofeedback on a computer

425 screen in healthy adults. Our findings suggest that increased embodiment may improve individuals'  
426 neurofeedback performance, which could potentially improve patients' recovery. Furthermore, our  
427 results suggest that HMD-VR may facilitate an increased level of embodiment, beyond what might  
428 be seen with traditional screen-based BCIs. As previous brain computer interfaces have been shown  
429 to have a positive change on muscle and sensorimotor brain activity in post-stroke individuals, even  
430 when using screen-based environments (Ono et al., 2014), we anticipate that embodiment in HMD-  
431 VR may lead to even greater improvements. Future work might explore whether additional measures  
432 of embodiment, administered prior to HMD-VR neurofeedback training, could predict embodiment  
433 and neurofeedback performance. If so, these "pre-assessments" of embodiment potential could be  
434 used to predict and personalize neurofeedback-based BCI therapy. However, as this data is  
435 preliminary, more data is needed to explore this hypothesis.

#### 436 **4.6 Limitations**

437 Our pilot study has several limitations. First was the limited sample size of 12 individuals and  
438 the limited number of trials collected per condition (i.e., 30 trials per condition). However, even with  
439 this limited sample, we were still able to extract the power spectral density (PSD), calculate relative  
440 PSD to baseline, and find a significant relationship between PSD and neurofeedback performance.  
441 However, future research should explore this with greater power both in the number of participants  
442 and in the number of trials collected.

443 A second limitation was the lack of longitudinal data collected in the experiment, which limited  
444 the potential amount of training participants received and the potential for performance improvement.  
445 However, as this was a pilot study, we only collected data during one session. In future studies, we  
446 plan to replicate this experiment, including additional trials and sessions in the experimental design.

447 A third limitation was the use of only 8 channels of dry electrodes to collect sensorimotor  
448 activity and the broad frequency band used (8-24 Hz). Given that our system was initially designed to  
449 provide a low-cost rehabilitation intervention, we chose to drive the neurofeedback-based device with  
450 a limited number of dry electrodes as previous studies have found dry electrodes to be suitable for  
451 neurofeedback applications (McMahon and Schukat, 2018; Uktveris and Jusas, 2018). However, we  
452 recognize that the signal quality of these electrodes can be noisy, and even though we were able to  
453 successfully extract power spectral density, in future studies, we plan to use higher quality electrodes  
454 (e.g., active gel electrodes) which would also allow us to narrow the frequency band and personalize  
455 the feedback across individuals. In addition, although the low resolution from 8 channels, primarily  
456 clustered around bilateral sensorimotor regions, facilitated a faster application of the EEG cap, it also  
457 limited our post-hoc analyses. Future research studies should utilize more channels for higher  
458 resolution. This would enable topographical analyses of whole brain activity during neurofeedback  
459 training as well as the ability to examine brain activity in non-motor regions as control regions.

460 A fourth limitation is that here, we studied only healthy individuals. This is notable as the  
461 effects observed may be smaller than those of a clinical population, who may have more room to  
462 improve. Specifically, the healthy individuals in our study showed, on average, 80% accuracy with  
463 the neurofeedback-based BCI within a short time frame, which may reflect their intact sensorimotor  
464 control. However, individuals with severe motor impairments may start with lower scores and have  
465 greater room for improvement due to damage to these same networks. Future work may examine  
466 extended training with the HMD-VR environment to see if it is possible for individuals to improve  
467 beyond their current levels with greater time in the environment, as well as the effects of embodiment  
468 on neurofeedback-based BCI performance in individuals with stroke, which may provide a greater

469 range of abilities and thus greater potential effects with immersive virtual reality. Future work should  
470 build upon these modest results and explore the effects of embodiment on HMD-VR neurofeedback  
471 performance with large samples and in clinical populations.

#### 472 **4.7 Conclusions**

473 This preliminary work suggests that individuals have higher levels of embodiment when given  
474 immersive virtual reality-based neurofeedback compared to the neurofeedback displayed on a  
475 computer screen. Furthermore, this increased sense of embodiment in immersive virtual reality  
476 neurofeedback has the potential to improve neurofeedback performance in healthy individuals over  
477 their performance on a computer screen. HMD-VR may provide a unique medium for improving  
478 neurofeedback-based BCI performance, especially in clinical settings related to motor recovery.  
479 Future work will explore ways to increase presence and embodiment in immersive head-mounted  
480 virtual reality and examine these effects on motor rehabilitation in patients with severe motor  
481 impairment.

482

#### 483 **5 Acknowledgments**

484 We thank David Saldana for assistance with recruitment and Catherine Finnegan for assistance with  
485 recruitment and initial pilot data collection.

486

#### 487 **6 Conflict of Interest**

488 The authors declare that the research was conducted in the absence of any commercial or financial  
489 relationships that could be construed as a potential conflict of interest.

490

#### 491 **7 Reference**

- 492 Ang, K. K., Guan, C., Phua, K. S., Wang, C., Zhou, L., Tang, K. Y., et al. (2014). Brain-computer  
493 interface-based robotic end effector system for wrist and hand rehabilitation: results of a three-  
494 armed randomized controlled trial for chronic stroke. *Front. Neuroeng.* 7, 30.  
495 doi:10.3389/fneng.2014.00030.
- 496 Bailey, J. O., Bailenson, J. N., and Casasanto, D. (2016). When does virtual embodiment change our  
497 minds? *Presence* 25, 222–233. doi:10.1162/PRES\_a\_00263.
- 498 Banakou, D., Groten, R., and Slater, M. (2013). Illusory ownership of a virtual child body causes  
499 overestimation of object sizes and implicit attitude changes. *Proc. Natl. Acad. Sci.* 110, 12846–  
500 12851. doi:10.1073/pnas.1306779110.
- 501 Banakou, D., Hanumanthu, P. D., and Slater, M. (2016). Virtual embodiment of white people in a  
502 black virtual body leads to a sustained reduction in their implicit racial bias. *Front. Hum.*  
503 *Neurosci.* 10, 601. doi:10.3389/fnhum.2016.00601.
- 504 Biasiucci, A., Leeb, R., Iturrate, I., Perdakis, S., Al-Khodairy, A., Corbet, T., et al. (2018). Brain-



- 505        actuated functional electrical stimulation elicits lasting arm motor recovery after stroke. *Nat.*  
506        *Commun.* 9, 2421. doi:10.1038/s41467-018-04673-z.
- 507        Carrasco, D. G., and Cantalapedra, J. A. (2016). Effectiveness of motor imagery or mental practice  
508        in functional recovery after stroke: a systematic review. *Neurol. (English Ed.)* 31, 43–52.  
509        doi:10.1016/j.nrleng.2013.02.008.
- 510        Cincotti, F., Pichiorri, F., Aricò, P., Aloise, F., Leotta, F., De Vico Fallani, F., et al. (2012). EEG-  
511        based Brain-Computer Interface to support post-stroke motor rehabilitation of the upper limb. in  
512        *2012 Annual International Conference of the IEEE Engineering in Medicine and Biology*  
513        *Society* (San Diego, California, USA: IEEE), 4112–4115.
- 514        Dechent, P., Merboldt, K.-D., and Frahm, J. (2004). Is the human primary motor cortex involved in  
515        motor imagery? *Cogn. Brain Res.* 19, 138–144. doi:10.1016/j.cogbrainres.2003.11.012.
- 516        Delorme, A., and Makeig, S. (2004). EEGLAB: an open source toolbox for analysis of single-trial  
517        EEG dynamics including independent component analysis. *J. Neurosci. Methods* 134, 9–21.
- 518        Franceschini, M., Ceravolo, M. G., Agosti, M., Cavallini, P., Bonassi, S., Dall’Armi, V., et al.  
519        (2012). Clinical relevance of action observation in upper-limb stroke rehabilitation.  
520        *Neurorehabil. Neural Repair* 26, 456–462. doi:10.1177/1545968311427406.
- 521        Frolov, A. A., Mokienko, O., Lyukmanov, R., Biryukova, E., Kotov, S., Turbina, L., et al. (2017).  
522        Post-stroke Rehabilitation Training with a Motor-Imagery-Based Brain-Computer Interface  
523        (BCI)-Controlled Hand Exoskeleton: A Randomized Controlled Multicenter Trial. *Front.*  
524        *Neurosci.* 11, 400. doi:10.3389/fnins.2017.00400.
- 525        Garrison, K. A., Aziz-Zadeh, L., Wong, S. W., Liew, S.-L., and Winstein, C. J. (2013). Modulating  
526        the motor system by action observation after stroke. *Stroke* 44, 2247–2253.  
527        doi:10.1161/STROKEAHA.113.001105.
- 528        Garrison, K. A., Winstein, C. J., and Aziz-Zadeh, L. (2010). The mirror neuron system: a neural  
529        substrate for methods in stroke rehabilitation. *Neurorehabil. Neural Repair* 24, 404–412.  
530        doi:10.1177/1545968309354536.
- 531        Guerra, Z. F., Bellose, L. C., Danielli Coelho De Morais Faria, C., and Lucchetti, G. (2018). The  
532        effects of mental practice based on motor imagery for mobility recovery after subacute stroke:  
533        Protocol for a randomized controlled trial. *Complement. Ther. Clin. Pract.* 33, 36–42.  
534        doi:10.1016/j.ctcp.2018.08.002.
- 535        Jackson, P. L., Lafleur, M. F., Malouin, F., Richards, C. L., and Doyon, J. (2003). Functional cerebral  
536        reorganization following motor sequence learning through mental practice with motor imagery.  
537        *Neuroimage* 20, 1171–1180. doi:10.1016/S1053-8119(03)00369-0.
- 538        Kennedy, R. S., Lane, N. E., Berbaum, K. S., and Michael, G. (1993). Simulator sickness  
539        questionnaire: an enhanced method for quantifying simulator sickness. *Int. J. Aviat. Psychol.* 3,  
540        203–220. doi:10.1207/s15327108ijap0303\_3.
- 541        Kilteni, K., Bergstrom, I., and Slater, M. (2013). Drumming in immersive virtual reality: the body  
542        shapes the way we play. *IEEE Trans. Vis. Comput. Graph.* 19, 597–605.

- 543        doi:10.1109/TVCG.2013.29.
- 544        Kilteni, K., Normand, J.-M., Sanchez-Vives, M. V., and Slater, M. (2012). Extending body space in  
545        immersive virtual reality: a very long arm illusion. *PLoS One* 7, e40867.  
546        doi:10.1371/journal.pone.0040867.
- 547        Leeb, R., Lee, F., Keinrath, C., Scherer, R., Bischof, H., and Pfurtscheller, G. (2007). Brain-computer  
548        communication: motivation, aim, and impact of exploring a virtual apartment. *IEEE Trans.*  
549        *Neural Syst. Rehabil. Eng.* 15, 473–482. doi:10.1109/TNSRE.2007.906956.
- 550        McMahon, M., and Schukat, M. (2018). A low-Cost, Open-Source, BCI-VR Game Control  
551        Development Environment Prototype for Game based Neurorehabilitation. in *IEEE Games,*  
552        *Entertainment, Media Conference (GEM)*, 1–9.
- 553        Naito, E., Kochiyama, T., Kitada, R., Nakamura, S., Matsumura, M., Yonekura, Y., et al. (2002).  
554        Internally simulated movement sensations during motor imagery activate cortical motor areas  
555        and the cerebellum. *J. Neurosci.* 22, 3683–3691. doi:20026282.
- 556        Ono, T., Shindo, K., Kawashima, K., Ota, N., Ito, M., Ota, T., et al. (2014). Brain-computer interface  
557        with somatosensory feedback improves functional recovery from severe hemiplegia due to  
558        chronic stroke. *Front. Neuroeng.* 7. doi:10.3389/fneng.2014.00019.
- 559        Osimo, S. A., Pizarro, R., Spanlang, B., and Slater, M. (2015). Conversations between self and self as  
560        Sigmund Freud—A virtual body ownership paradigm for self counselling. *Sci. Rep.* 5, 13899.  
561        doi:10.1038/srep13899.
- 562        Pavone, E. F., Tieri, G., Rizza, G., Tidoni, E., Grisoni, L., and Aglioti, S. M. (2016). Embodying  
563        others in immersive virtual reality: electro-cortical signatures of monitoring the errors in the  
564        actions of an avatar seen from a first-person perspective. *J. Neurosci.* 36, 268–279.  
565        doi:10.3389/fpsyg.2016.01260.
- 566        Pichiorri, F., Morone, G., Petti, M., Toppi, J., Pisotta, I., Molinari, M., et al. (2015). Brain-computer  
567        interface boosts motor imagery practice during stroke recovery. *Ann. Neurol.* 77, 851–865.  
568        doi:10.1002/ana.24390.
- 569        Prochnow, D., Bermúdez i Badia, S., Schmidt, J., Duff, A., Brunheim, S., Kleiser, R., et al. (2013). A  
570        functional magnetic resonance imaging study of visuomotor processing in a virtual reality-based  
571        paradigm: Rehabilitation Gaming System. *Eur. J. Neurosci.* 37, 1441–1447.  
572        doi:10.1111/ejn.12157.
- 573        Ramos-Murguialday, A., Broetz, D., Rea, M., Läer, L., Yilmaz, Ö., Brasil, F. L., et al. (2013). Brain-  
574        machine interface in chronic stroke rehabilitation: a controlled study. *Ann. Neurol.* 74, 100–108.  
575        doi:10.1002/ana.23879.
- 576        Slater, M., and Sanchez-Vives, M. V. (2016). Enhancing our lives with immersive virtual reality.  
577        *Front. Robot. AI* 3, 74. doi:10.3389/frobt.2016.00074.
- 578        Spicer, R., Anglin, J., Krum, D. M., and Liew, S. L. (2017). REINVENT: A low-cost, virtual reality  
579        brain-computer interface for severe stroke upper limb motor recovery. in *IEEE Virtual Reality*  
580        (IEEE), 385–386. doi:10.1109/VR.2017.7892338.

- 581 Tung, S. W., Guan, C., Ang, K. K., Phua, K. S., Wang, C., Zhao, L., et al. (2013). Motor imagery  
 582 BCI for upper limb stroke rehabilitation: an evaluation of the EEG recordings using coherence  
 583 analysis. in *2013 35th Annual International Conference of the IEEE Engineering in Medicine  
 584 and Biology Society (EMBC) (IEEE)*, 261–261.
- 585 Uktveris, T., and Jusas, V. (2018). Development of a modular board for eeg signal acquisition.  
 586 *Sensors (Switzerland)* 18, 2140. doi:10.3390/s18072140.
- 587 Vecchiato, G., Tieri, G., Jelic, A., De Matteis, F., Maglione, A. G., and Babiloni, F. (2015).  
 588 Electroencephalographic Correlates of Sensorimotor Integration and Embodiment during the  
 589 Appreciation of Virtual Architectural Environments. *Front. Psychol.* 6, 1944.  
 590 doi:10.3389/fpsyg.2015.01944.
- 591 Vourvopoulos, A., and Bermúdez i Badia, S. (2016). Motor priming in virtual reality can augment  
 592 motor-imagery training efficacy in restorative brain-computer interaction: a within-subject  
 593 analysis. *J. Neuroeng. Rehabil.* 13, 69. doi:10.1186/s12984-016-0173-2.
- 594 Welch, P. D. (1967). The Use of Fast Fourier Transform for the Estimation of Power Spectra: A  
 595 Method Based on Time Averaging Over Short, Modified Periodograms. *IEEE Trans. Audio  
 596 Electroacoust.* 15, 70–73.
- 597 Witmer, B. G., and Singer, M. J. (1998). Measuring presence in virtual environments: a presence  
 598 questionnaire. *Presence* 7, 225–240. doi:10.1162/105474698565686.
- 599 Yee, N., and Bailenson, J. N. (2007). The Proteus effect: The effect of transformed self-  
 600 representation on behavior. *Hum. Commun. Res.* 33, 271–290. doi:10.1111/j.1468-  
 601 2958.2007.00299.x.
- 602 Zhu, M.-H., Wang, J., Gu, X.-D., Shi, M.-F., Zeng, M., Wang, C.-Y., et al. (2015). Effect of action  
 603 observation therapy on daily activities and motor recovery in stroke patients. *Int. J. Nurs. Sci.* 2,  
 604 279–282. doi:10.1016/j.ijnss.2015.08.006.

605

606

## 607 **8 Tables and Figures**

608 **Table 1. Individual Questions on Embodiment Questionnaire.** After the Screen and HMD-VR  
 609 conditions (Blocks 1, 2), participants were asked questions relating to their level of embodiment in  
 610 each of the respective conditions. Participants reported their level of embodiment on a scale from 1 to  
 611 10. Self Embodiment and Spatial Embodiment was calculated by averaging the responses given for  
 612 each respective question type.

| Type | Question                                                              | Referenced   | Scoring Scale                 |
|------|-----------------------------------------------------------------------|--------------|-------------------------------|
| Self | To what extent did you feel that the virtual arm was your own arm?    | Own Arm      | Not at all/Very much (1...10) |
| Self | How much did the virtual arm's actions correspond with your commands? | Arms Actions | Not at all/Very much (1...10) |

|         |                                                                                                                                  |                       |                                  |
|---------|----------------------------------------------------------------------------------------------------------------------------------|-----------------------|----------------------------------|
| Self    | To what extent did you feel if something happened to the virtual arm it felt like it was happening to you?                       | Happening to Arm      | Not at all/Very much (1...10)    |
| Self    | How much control did you feel you had over the virtual arm in this virtual environment?                                          | Amount of Arm Control | No control/Full control (1...10) |
| Self    | How much did you feel that your virtual arm resembled your own (real) arm in terms of shape, skin tone or other visual features? | Resembled Arm         | Not at all/Very much (1...10)    |
| Self    | Did the virtual arm seem bigger, smaller or about the same as what you would expect from your everyday experience?               | Size of Arm           | Smaller/Larger (1...10)          |
| Spatial | To what extent did you feel like you were really located in the virtual environment?                                             | Location              | None/Completely (1...10)         |
| Spatial | To what extent did you feel surrounded by the virtual environment?                                                               | Surrounded            | None/Completely (1...10)         |
| Spatial | To what extent did you feel that the virtual environment seemed like the real world?                                             | Real World            | None/Completely (1...10)         |
| Spatial | To what extent did you feel like you could reach out and touch the objects in the virtual environment?                           | Reach Out and Touch   | None/Completely (1...10)         |

613

614 **Figure 1. REINVENT system.** (A) REINVENT hardware used here is composed of  
 615 electroencephalography (EEG), electromyography (EMG), inertial measurement units (IMUs), and a  
 616 head-mounted virtual reality (HMD-VR) system. Written informed consent for the publication of this  
 617 image was obtained from the individual depicted. (B) The environment participants observed on both  
 618 a computer screen and in HMD-VR; arm movements are goal-oriented such that when the arm  
 619 reaches a target position, it interacts with an object (e.g., hitting a beach ball). On EEG blocks  
 620 (Screen, HMD-VR), participants would attempt to move their virtual arm (right arm) to the orange  
 621 target arm (left arm) by thinking about movement. On the IMU block, the virtual arm would match  
 622 participants actual arm movements.

623 **Figure 2. Experimental timeline.** Prior to the experimental blocks, participants completed a  
 624 questionnaire relating to simulator sickness and then completed a resting EEG recording for three  
 625 minutes with eyes open. Participants then completed the three experimental blocks where the first  
 626 two blocks were counterbalanced; during Blocks 1 and 2 (Screen, HMD-VR), participants were  
 627 asked to think about movement in order to move their virtual arm to a virtual target arm on either a  
 628 computer screen or in HMD-VR. After the Screen condition and after the HMD-VR condition,  
 629 participants completed a resting EEG recording for three minutes with eyes open and then completed  
 630 a series of questionnaires relating to simulator sickness, presence, and embodiment. During Block 3  
 631 (IMU), participants were asked to move their physical arm to a virtual target arm in HMD-VR.

632 **Figure 3. Average performance on trials and time to complete successful trials between**  
 633 **conditions.** (A) The analysis showed no significant differences in performance between Screen (left,  
 634 blue) and HMD-VR (right, yellow) conditions ( $t(11) = -0.46, p = 0.656$ ). (B) The analysis showed no



635 significant differences in time on successful trials between Screen (left, blue) and HMD-VR (right,  
636 yellow) conditions ( $t(11) = 0.54$ ,  $p = 0.597$ ).

637 **Figure 4. Average power spectral density during trials between conditions.** (A) The relative  
638 group-level PSD (8-24 Hz) between the Screen (left, blue) and HMD-VR (right, yellow) conditions  
639 was not significantly different ( $t(11) = 0.475$ ,  $p = 0.644$ ). (B) The relative group-level alpha between  
640 the Screen (left, blue) and HMD-VR (right, yellow) conditions was also not significantly different  
641 ( $t(11) = 1.363$ ,  $p = 0.200$ ). (C) The relative group-level beta between the Screen (left, blue) and  
642 HMD-VR (right, yellow) conditions was also not significantly different ( $t(11) = -1.141$ ,  $p = 0.278$ ).

643 **Figure 5. Relationship between power spectral density and neurofeedback performance.** There  
644 was a significant relationship between PSD and neurofeedback performance ( $F(1,22) = 9.328$ ,  $p =$   
645  $0.006$ ;  $R^2 = 0.266$ ).

646 **Figure 6. Relationship between subjective experience and neurofeedback performance in**  
647 **Screen and HMD-VR.** Participants reported their level of Embodiment on a scale from 1 to 10  
648 (Table 1). (A) Embodiment: For the HMD-VR condition, embodiment was significantly related to  
649 performance ( $F(1,10) = 8.293$ ,  $p = 0.016$ ;  $R^2 = 0.399$ ; yellow). However, for the Screen condition,  
650 embodiment did not significantly relate to neurofeedback performance ( $F(1,10) = 0.434$ ,  $p = 0.525$ ;  
651  $R^2 = -0.054$ ; blue). (B) Self Embodiment and (C) Spatial Embodiment: For the HMD-VR condition,  
652 we found a near significant relationship between the two embodiment sub-features and  
653 neurofeedback performance ( $F(2,9) = 3.858$ ,  $p = 0.0617$ ;  $R^2 = 0.342$ ; yellow). However, for the  
654 Screen condition, we did not find a significant relationship between the two embodiment sub-features  
655 and neurofeedback performance ( $F(2,9) = 0.706$ ,  $p = 0.519$ ;  $R^2 = -0.056$ ; blue).



**A**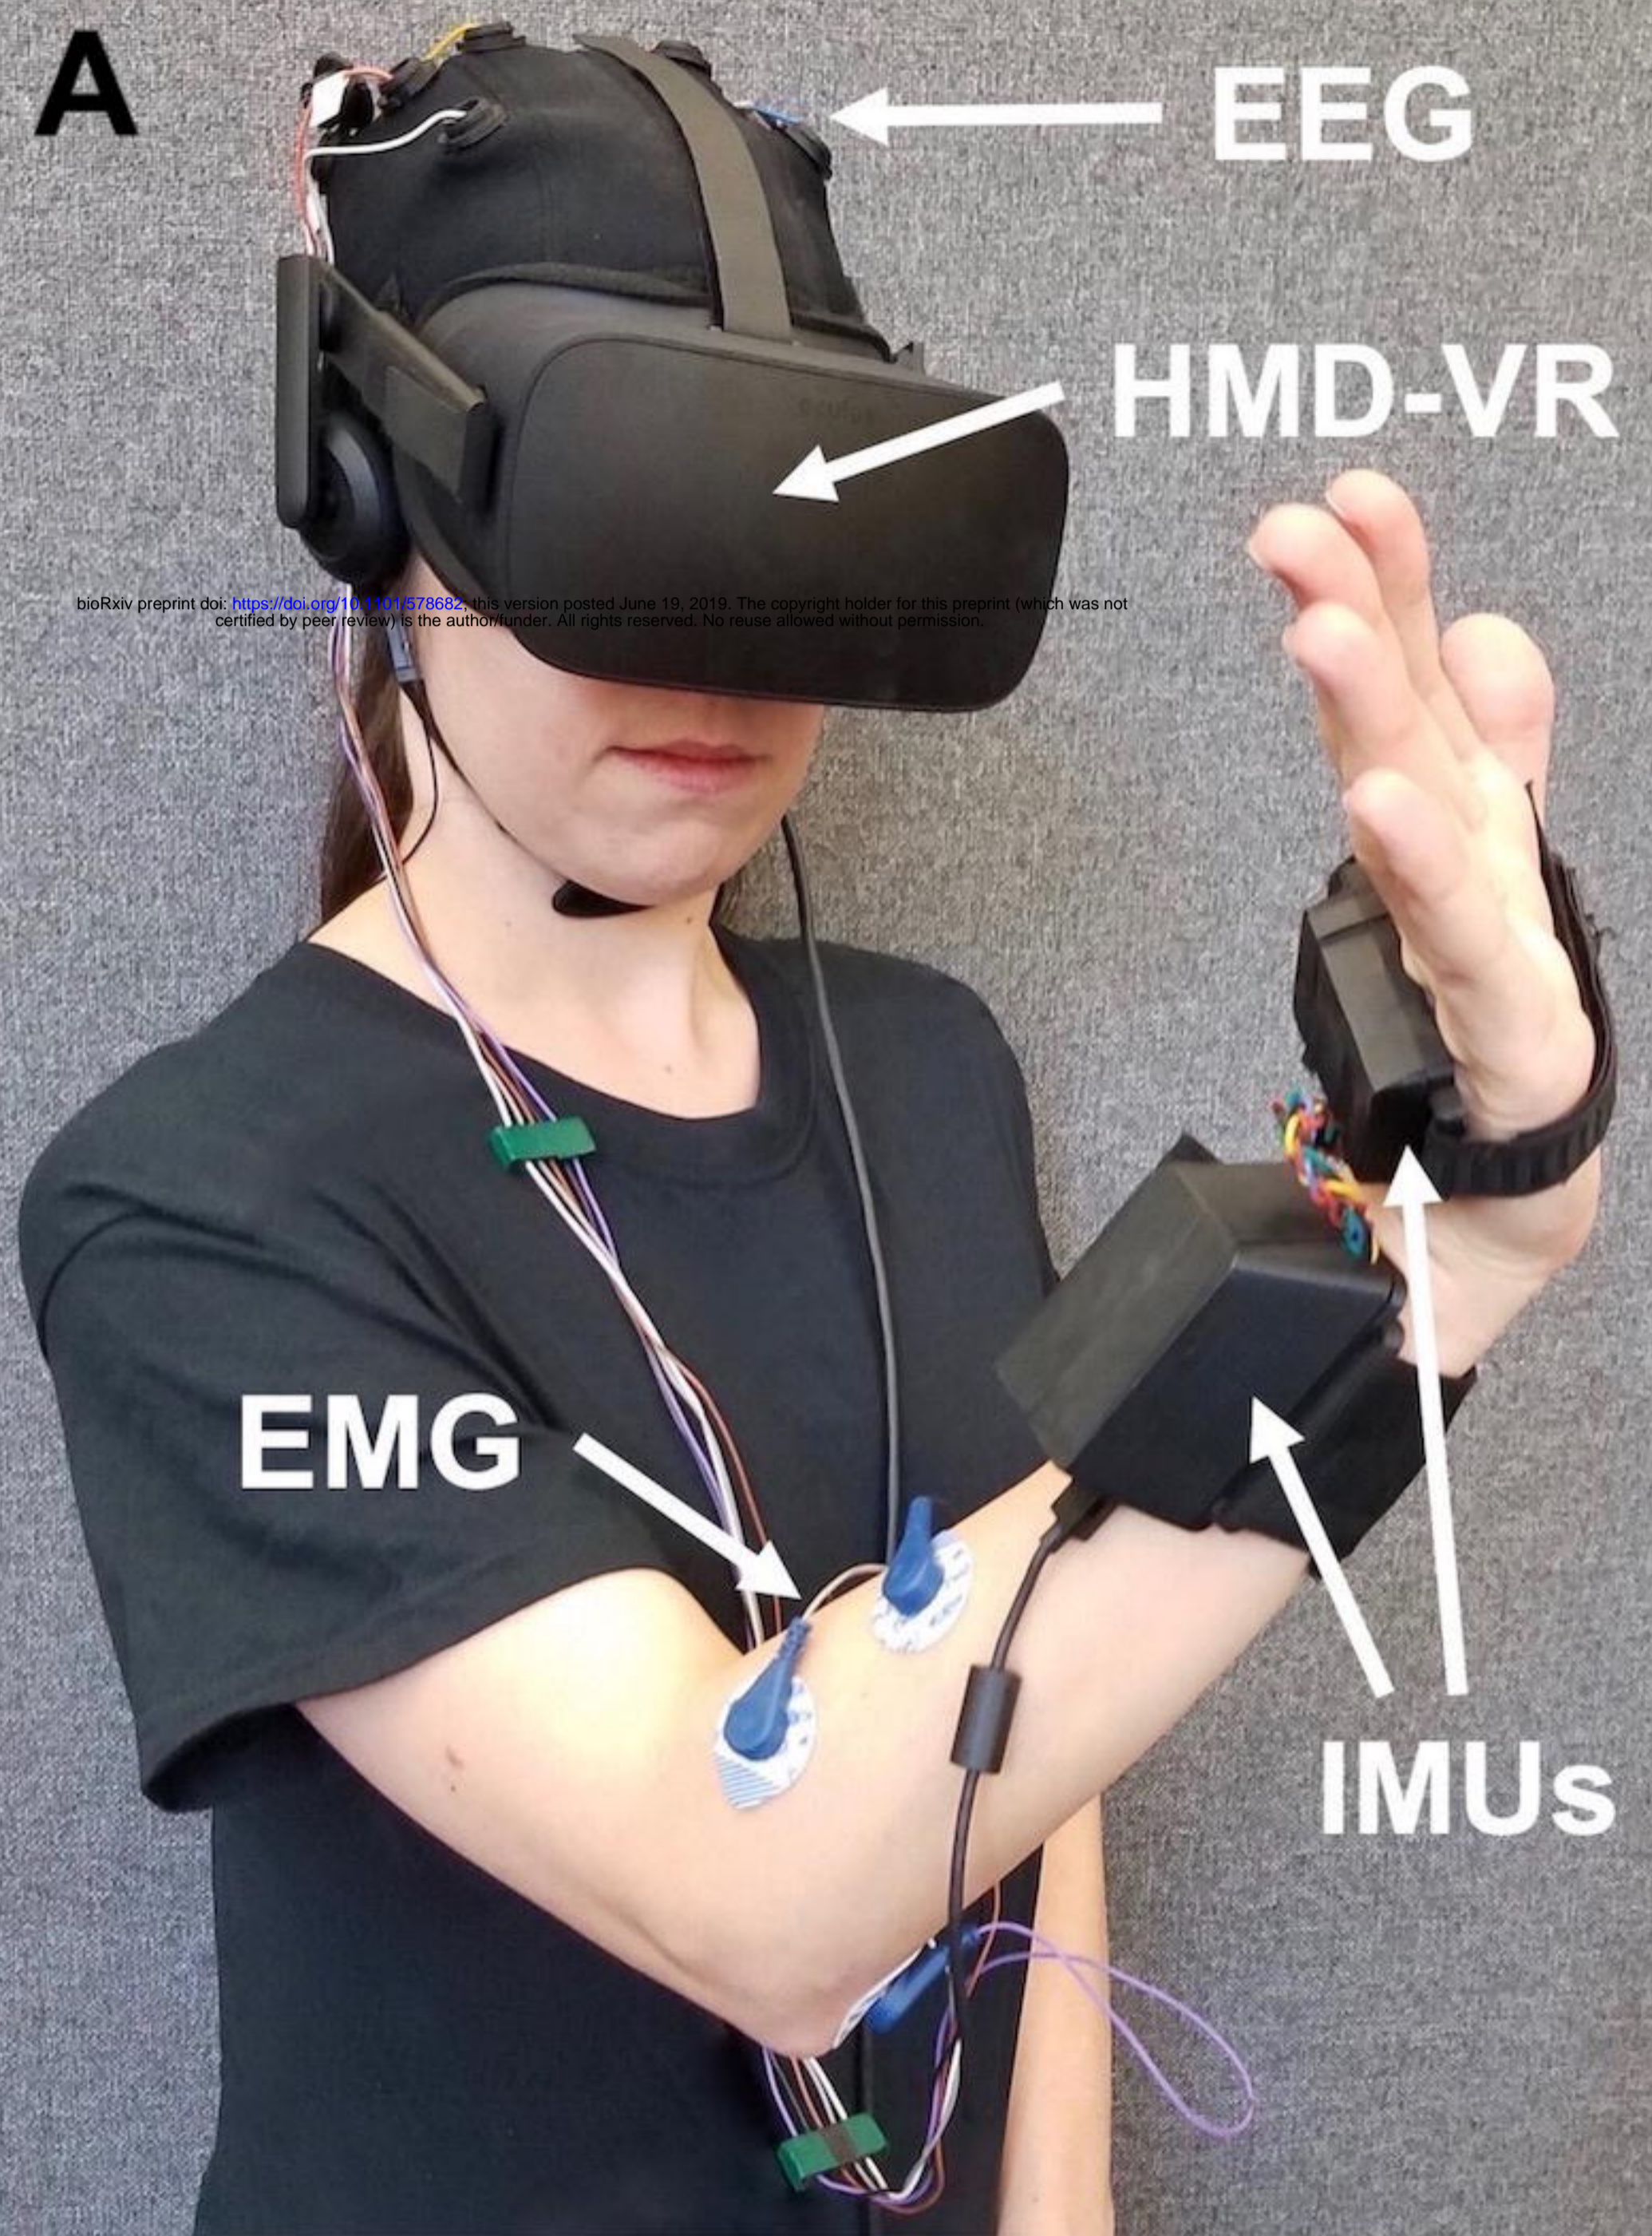**B**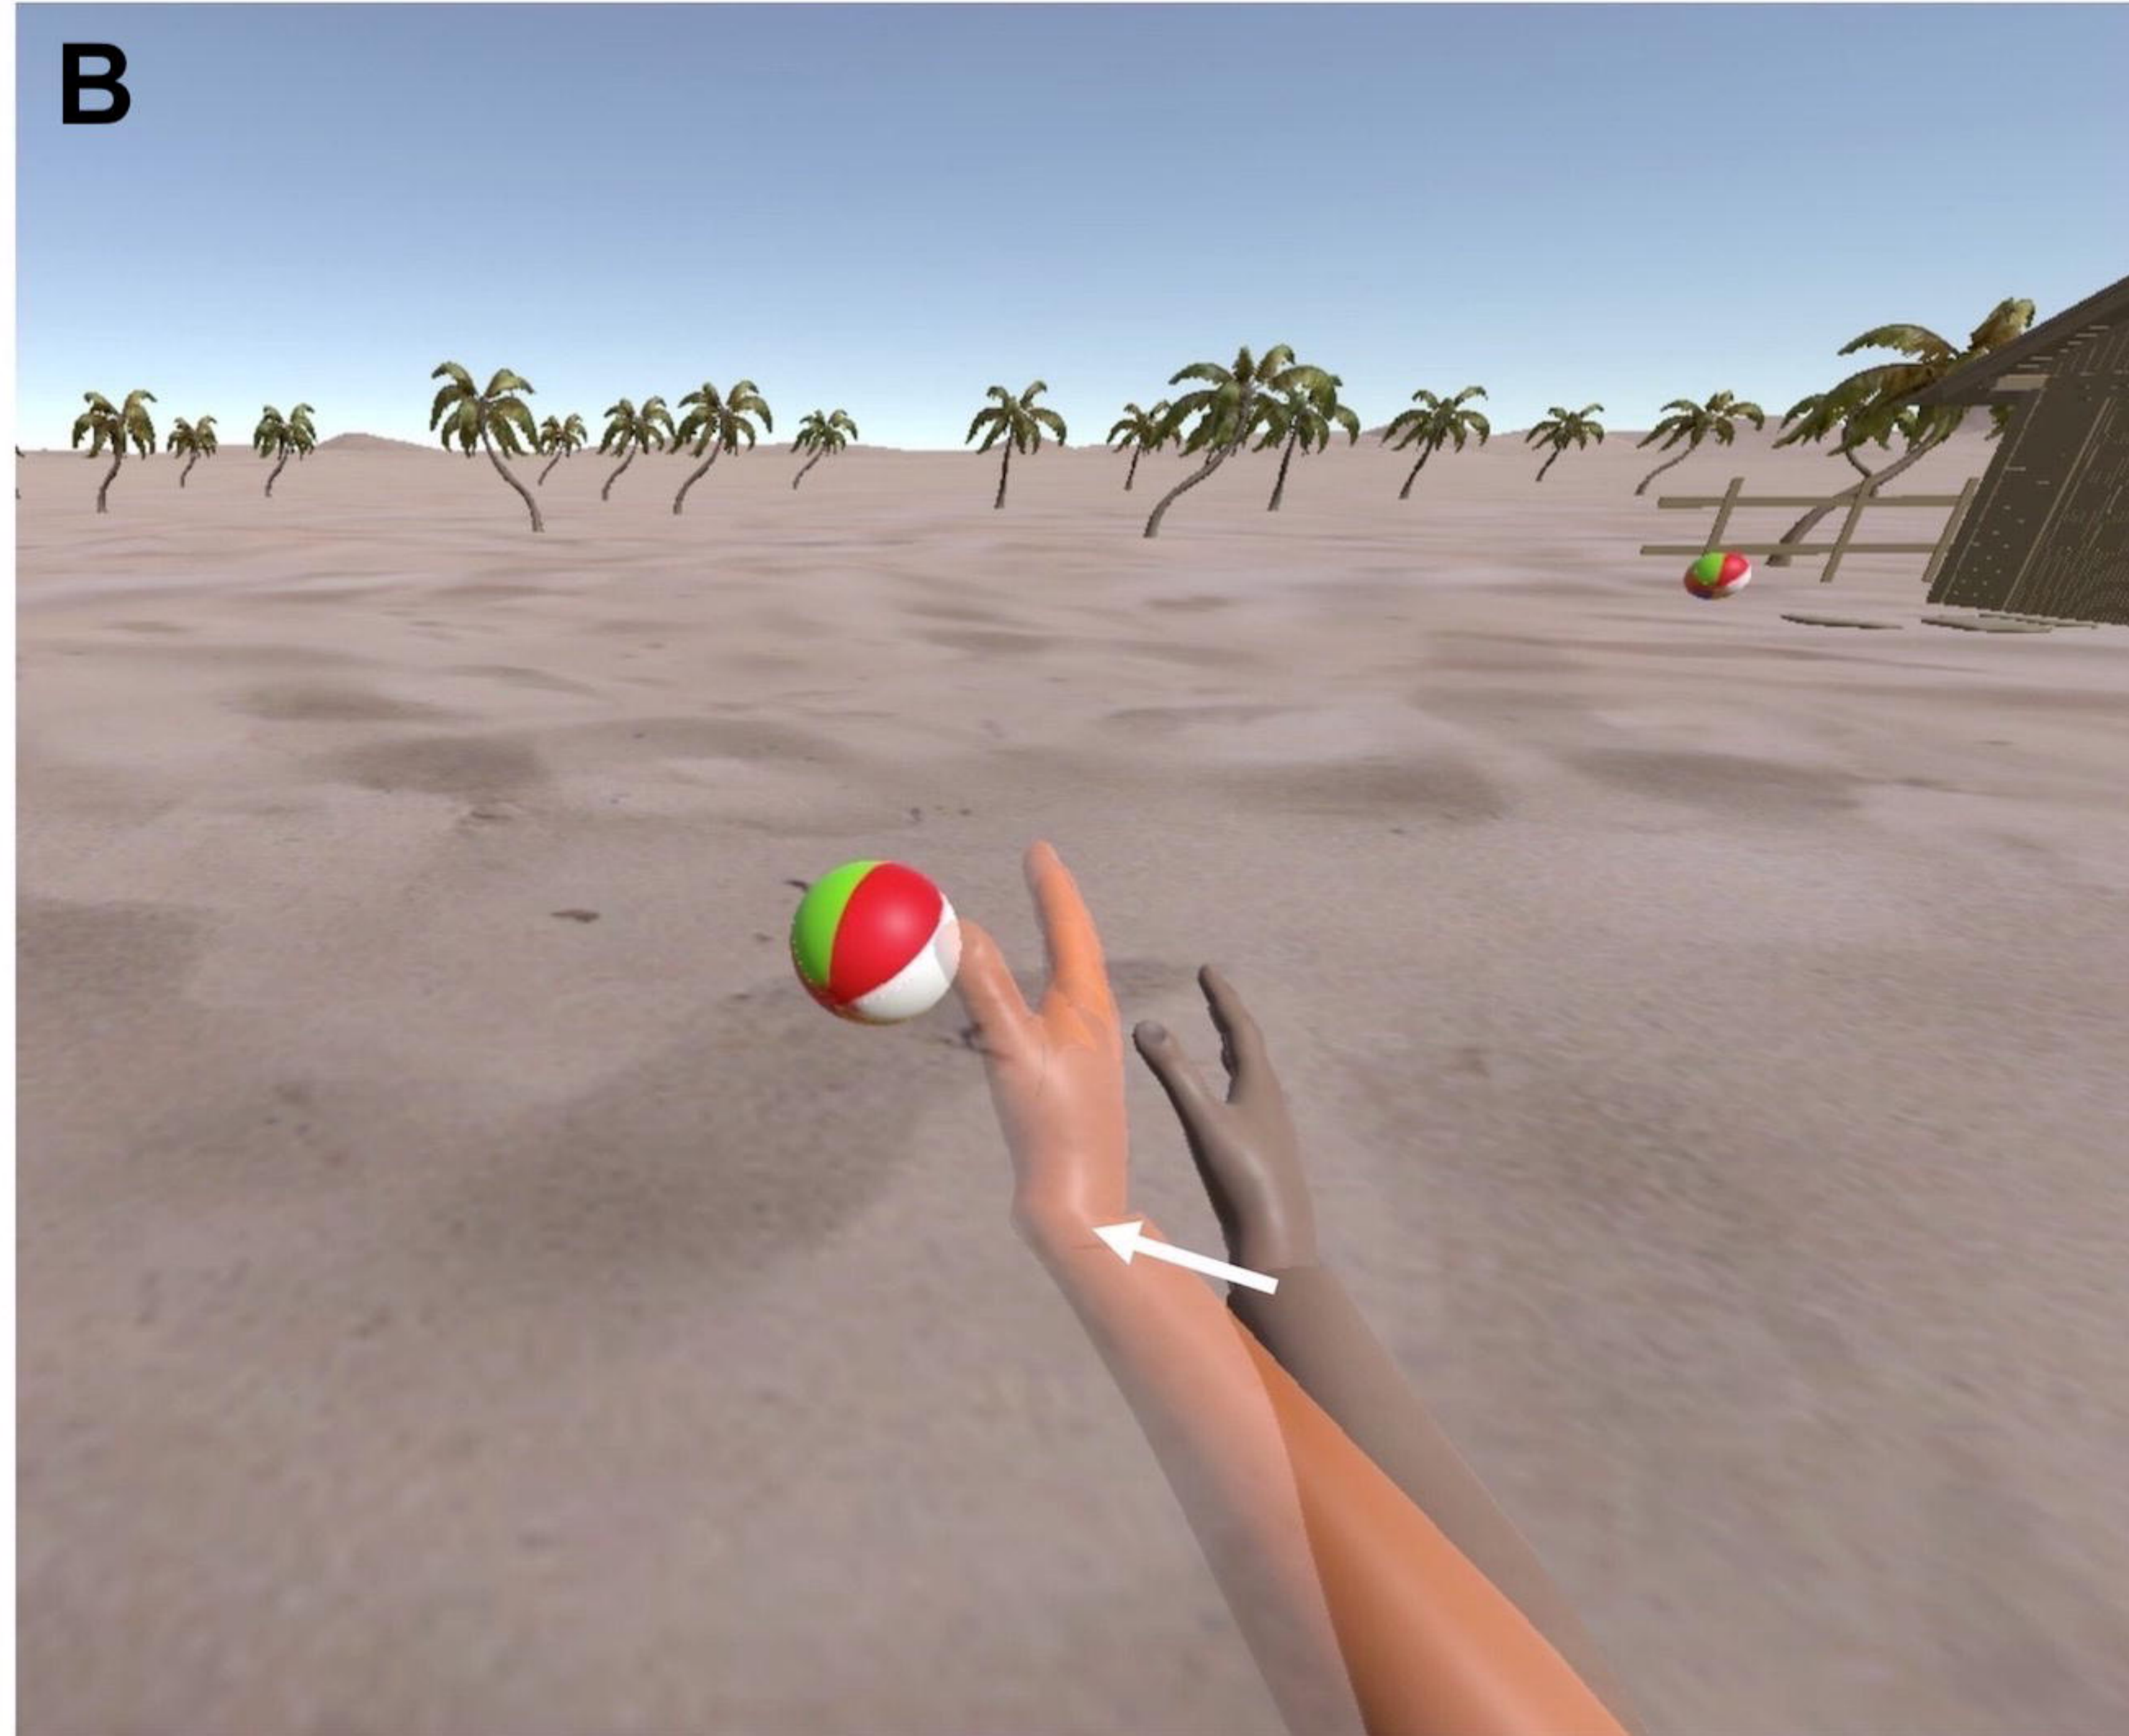



| Pre-Assessments                            |                                              | Screen                      | Post-Screen                                  |                                                                       | HMD-VR                      | Post-HMD-VR                                  |                                                                       | IMU                         |
|--------------------------------------------|----------------------------------------------|-----------------------------|----------------------------------------------|-----------------------------------------------------------------------|-----------------------------|----------------------------------------------|-----------------------------------------------------------------------|-----------------------------|
| <u>Questionnaire</u><br>Simulator Sickness | <u>Resting EEG</u><br>3 minutes<br>eyes open | <u>Block 1</u><br>30 trials | <u>Resting EEG</u><br>3 minutes<br>eyes open | <u>Questionnaires</u><br>Simulator Sickness<br>Presence<br>Embodiment | <u>Block 2</u><br>30 trials | <u>Resting EEG</u><br>3 minutes<br>eyes open | <u>Questionnaires</u><br>Simulator Sickness<br>Presence<br>Embodiment | <u>Block 3</u><br>30 trials |

Counterbalanced

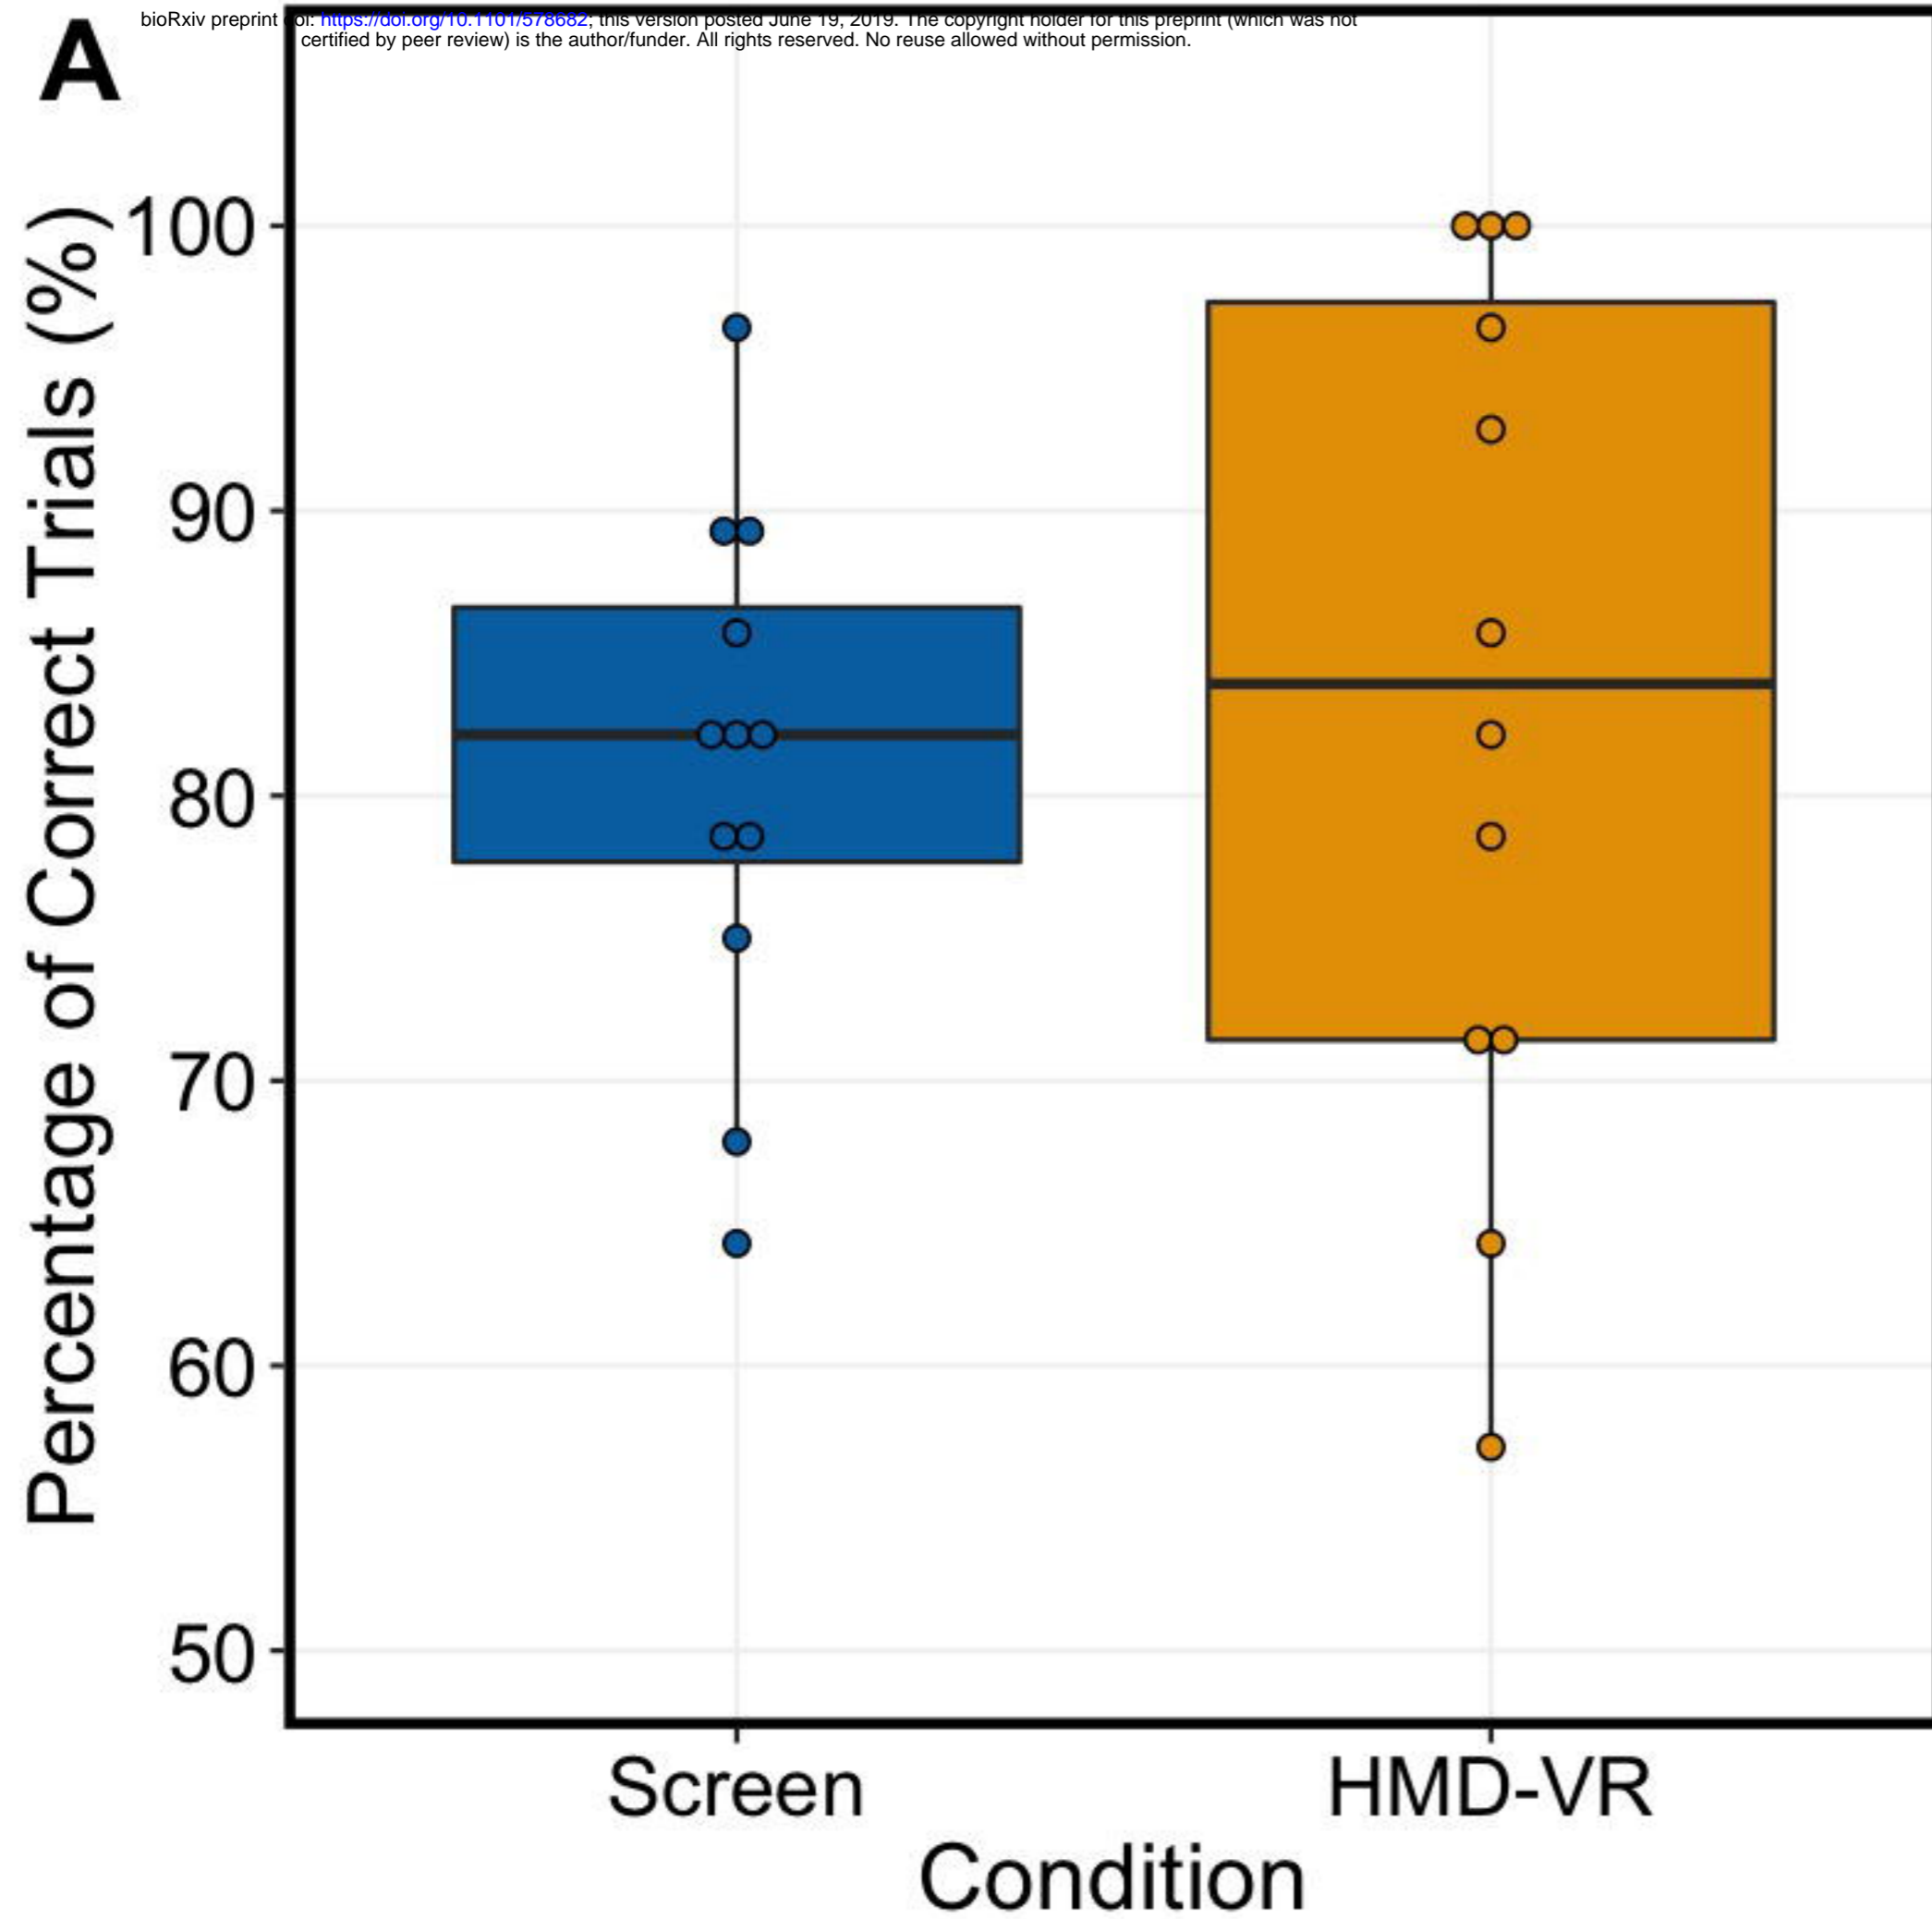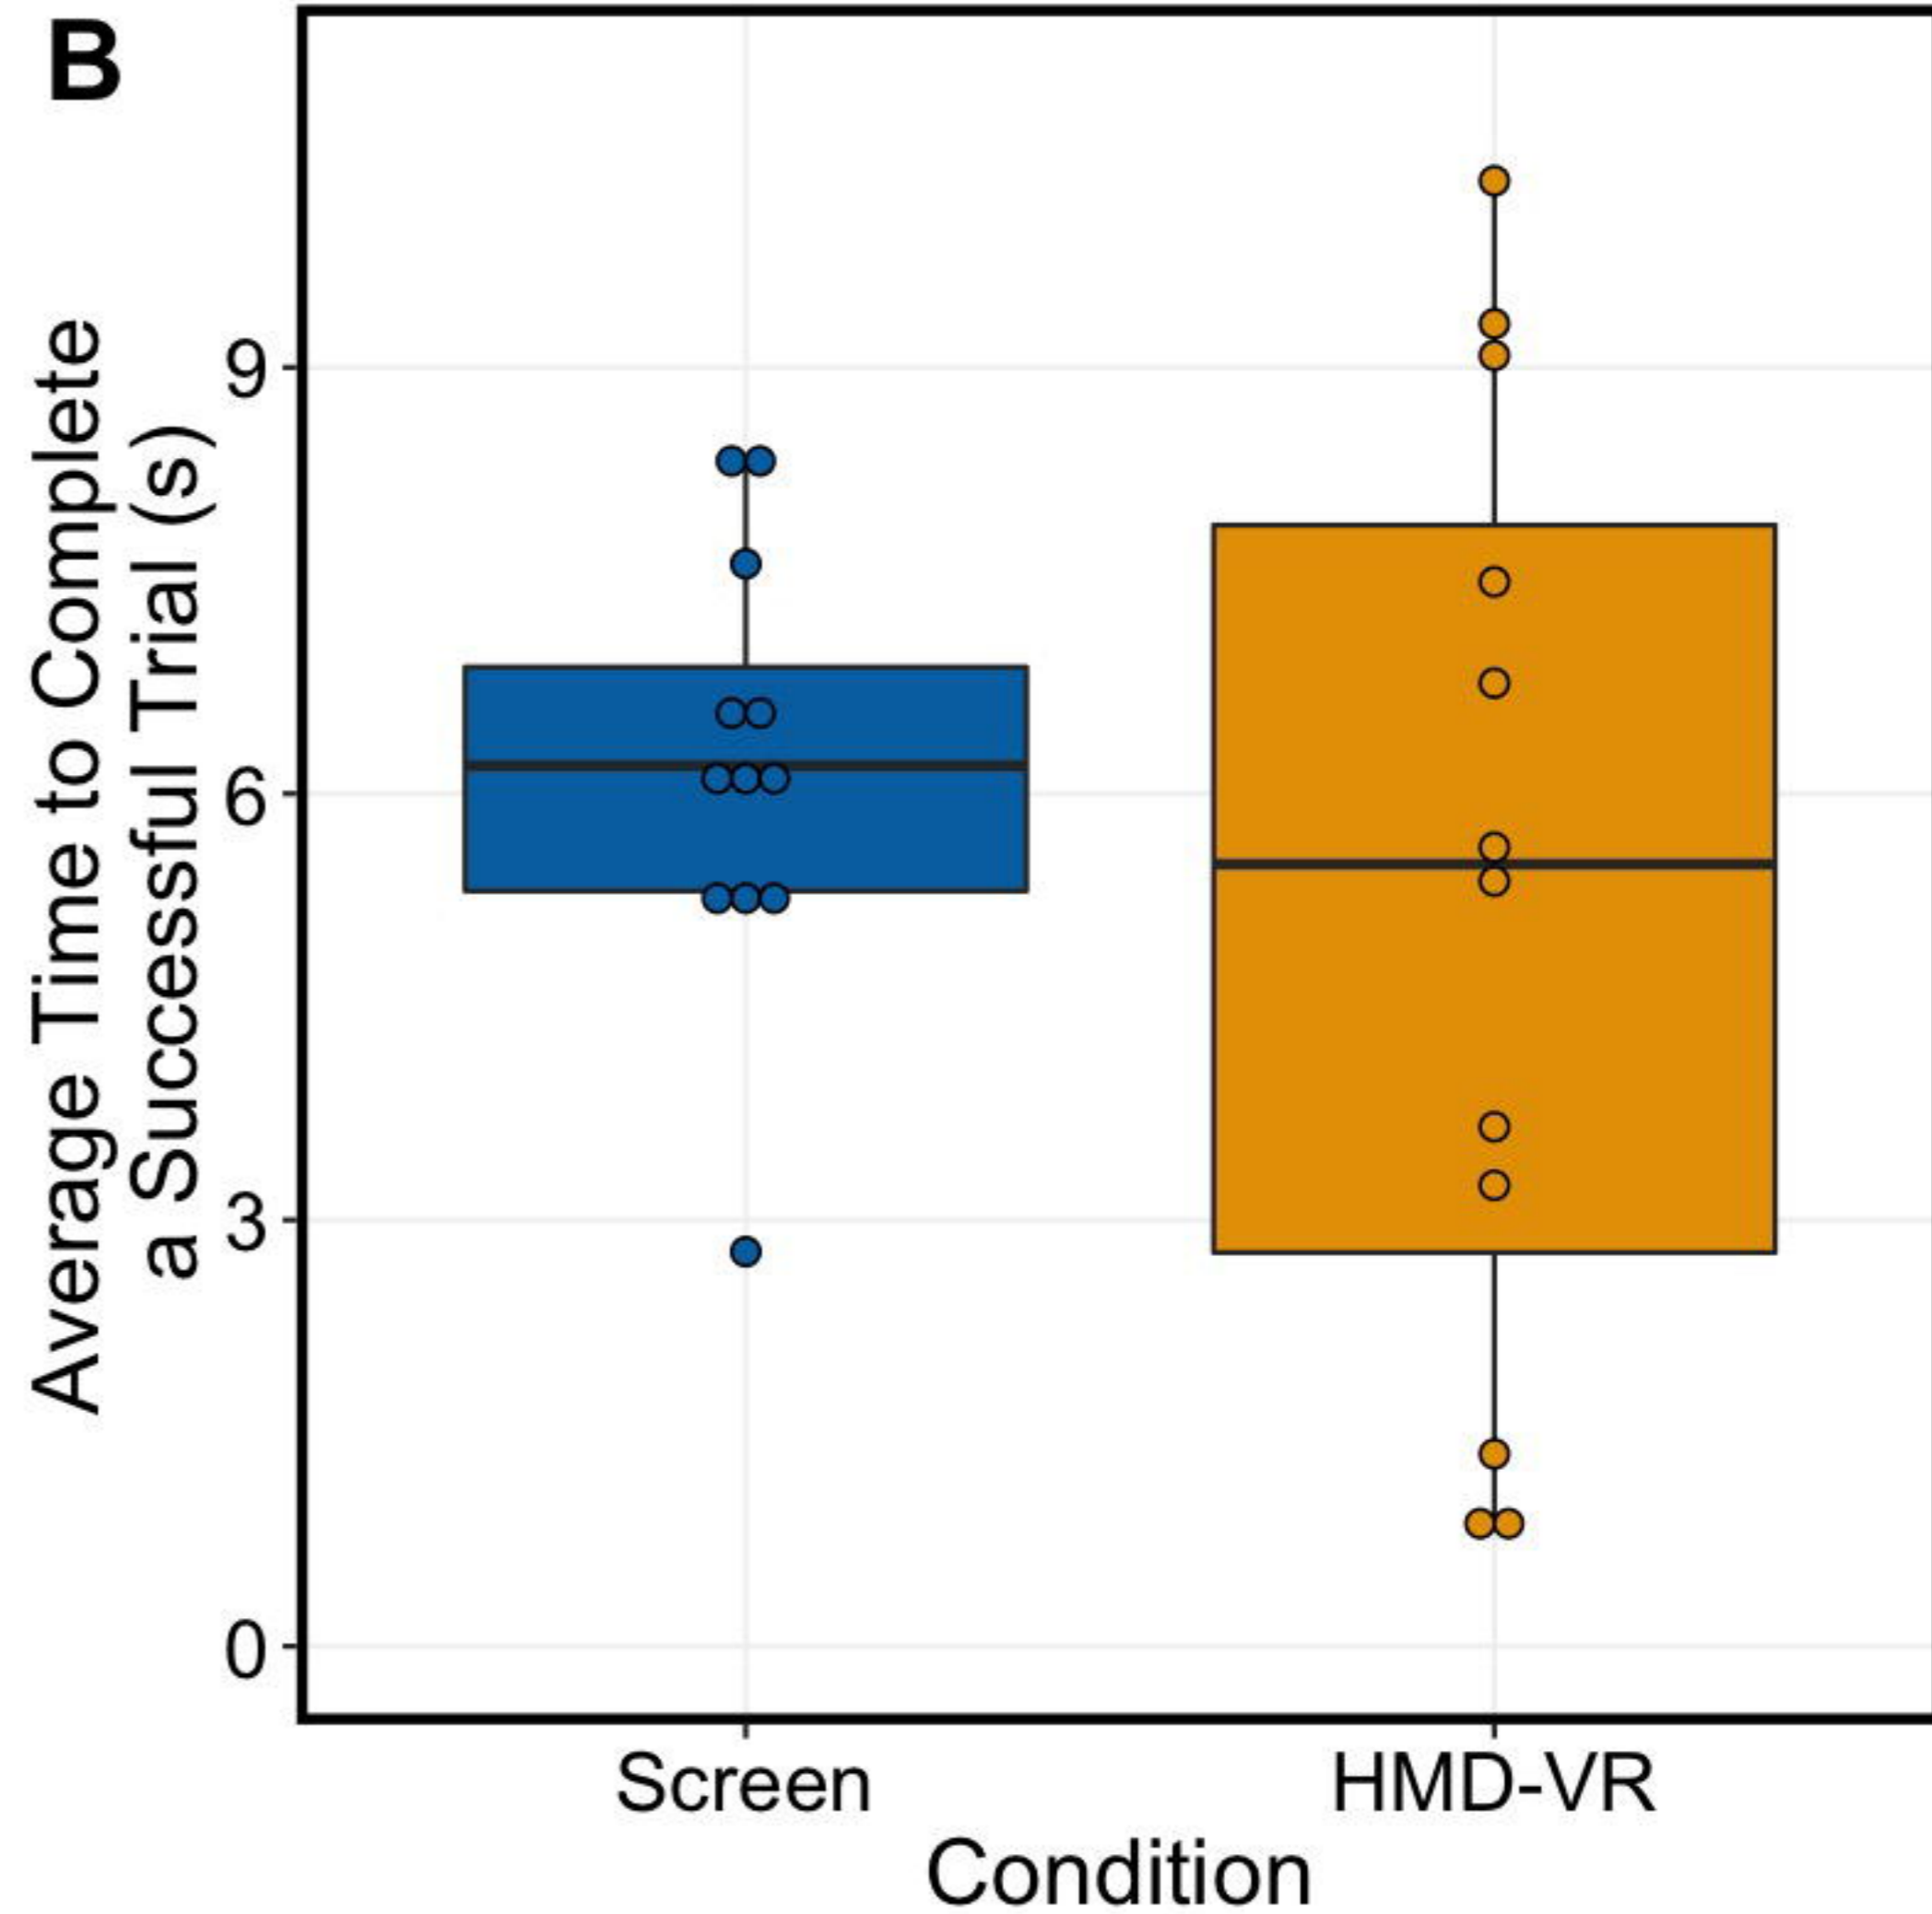



**A****Frequency range: 8-24 Hz**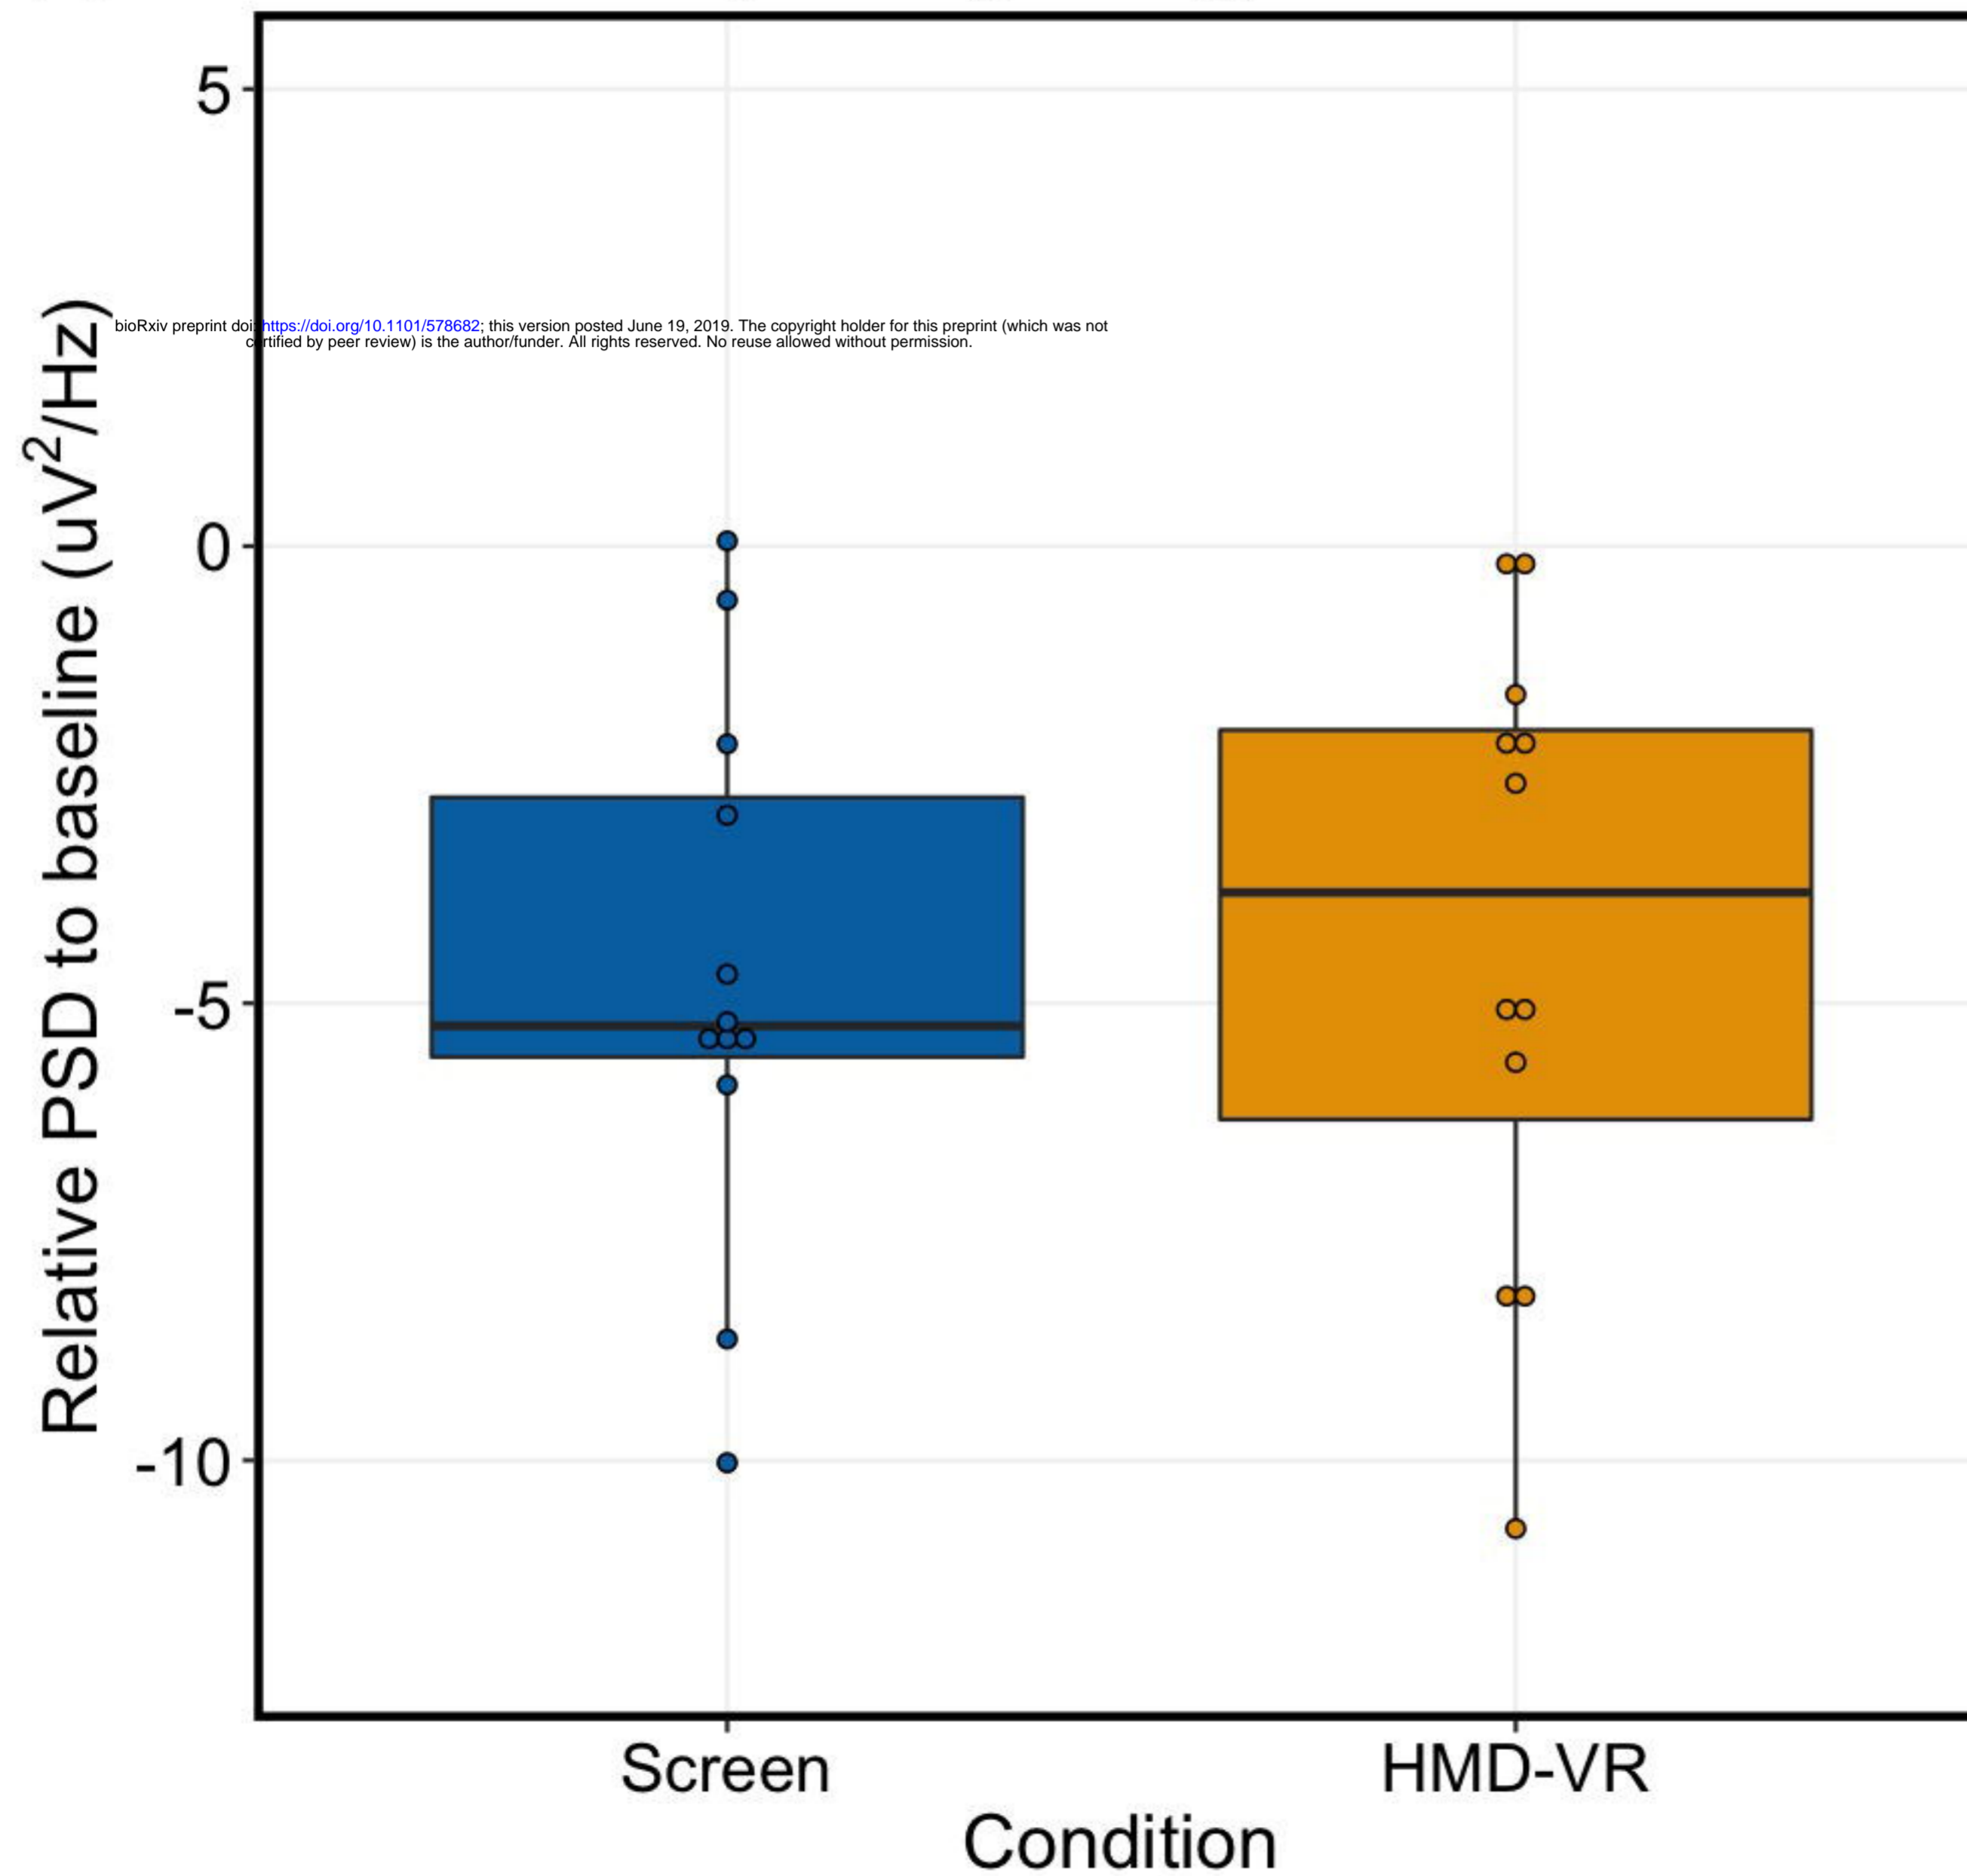**B****Alpha: 8-12 Hz**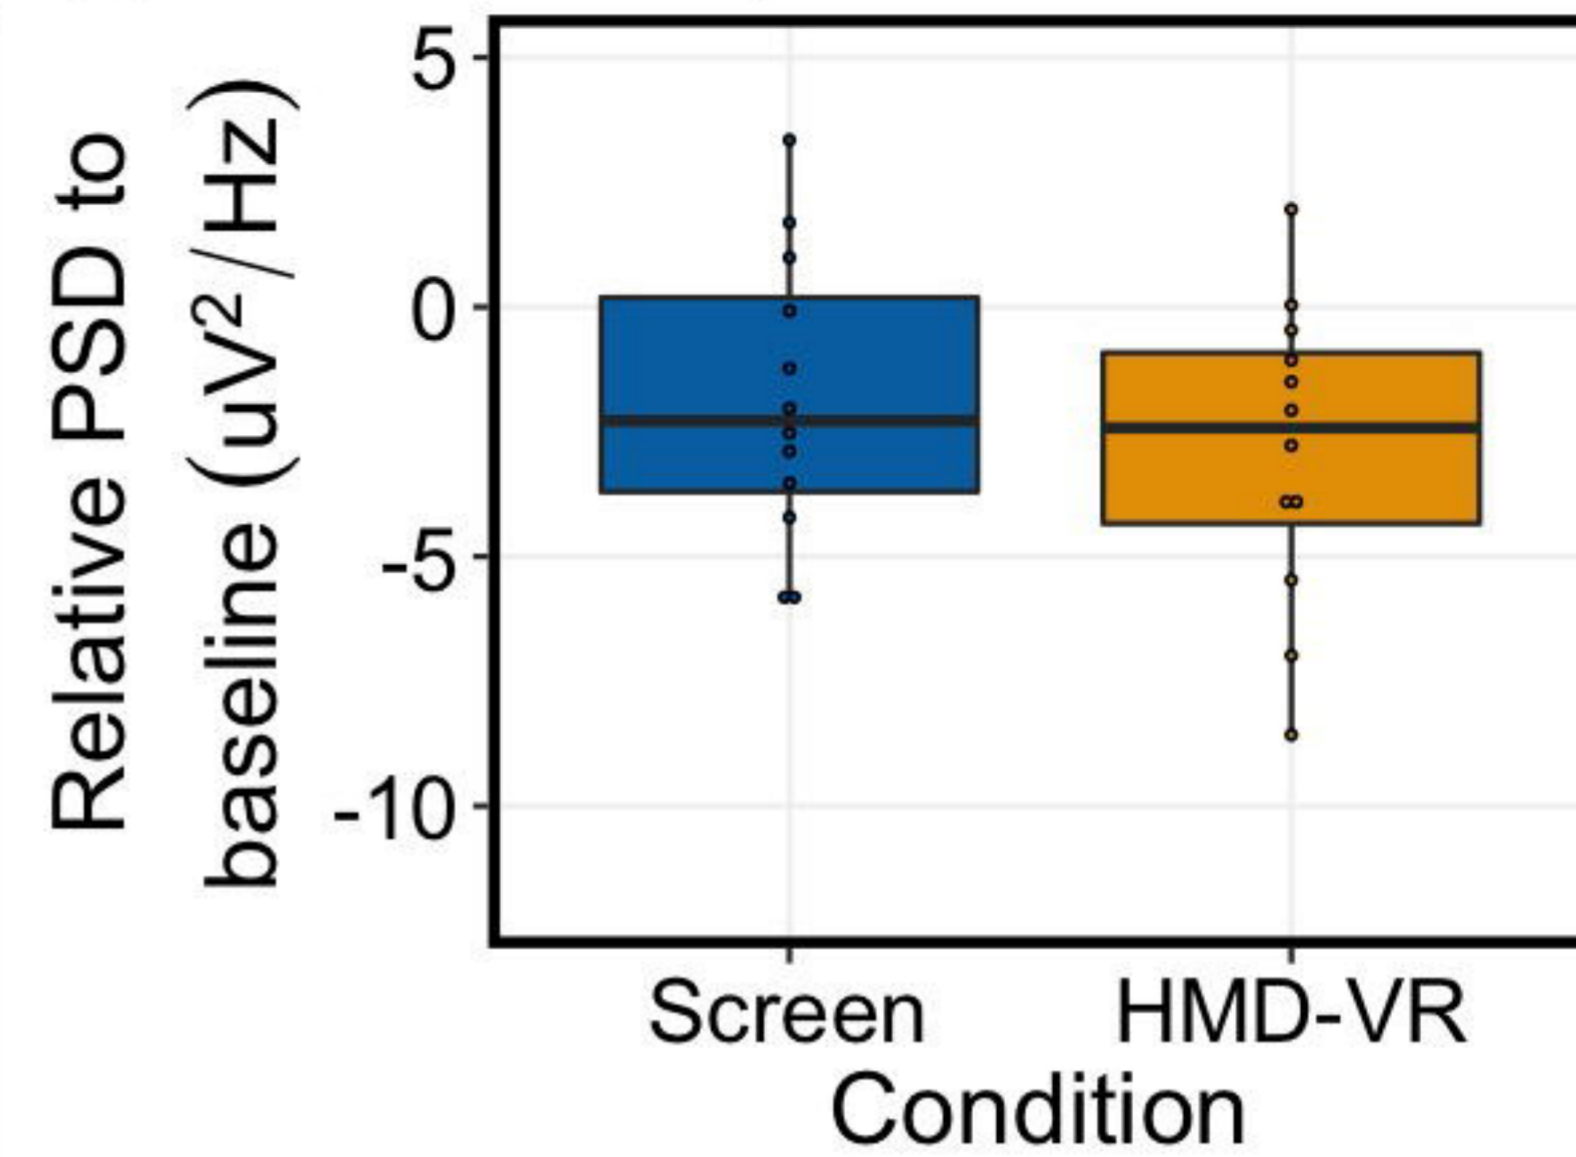**C****Beta: 13-24 Hz**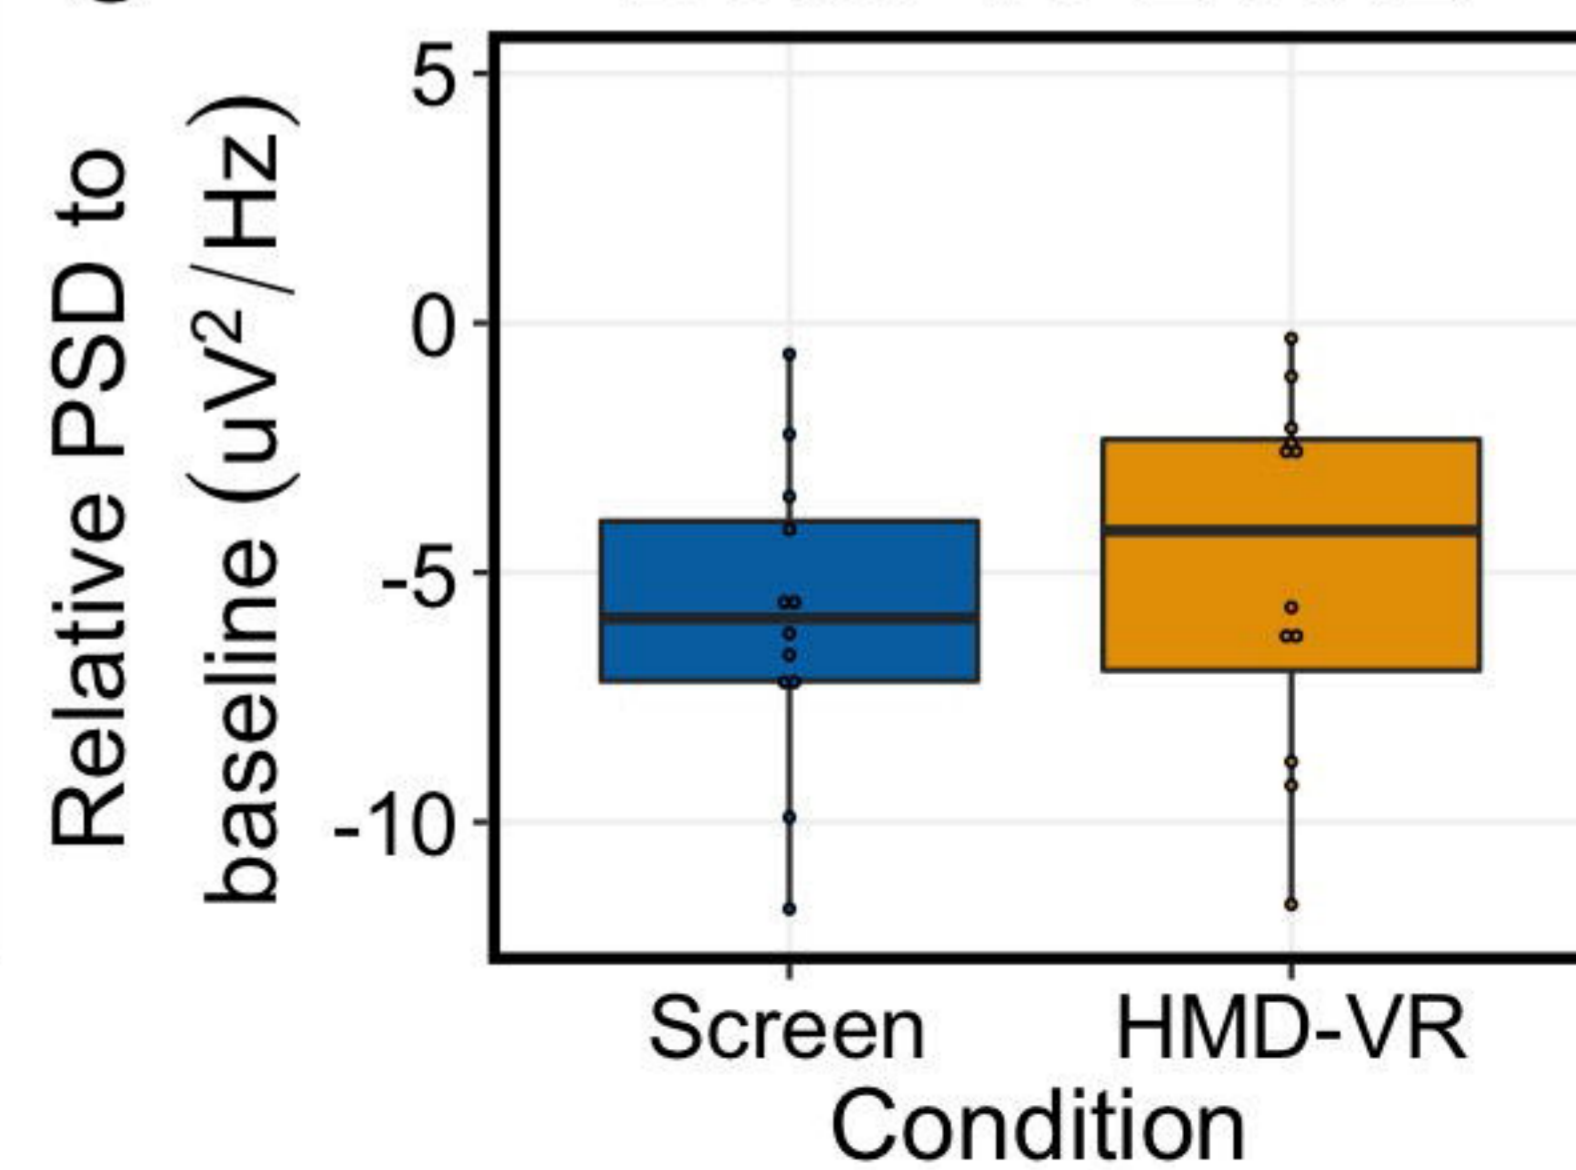

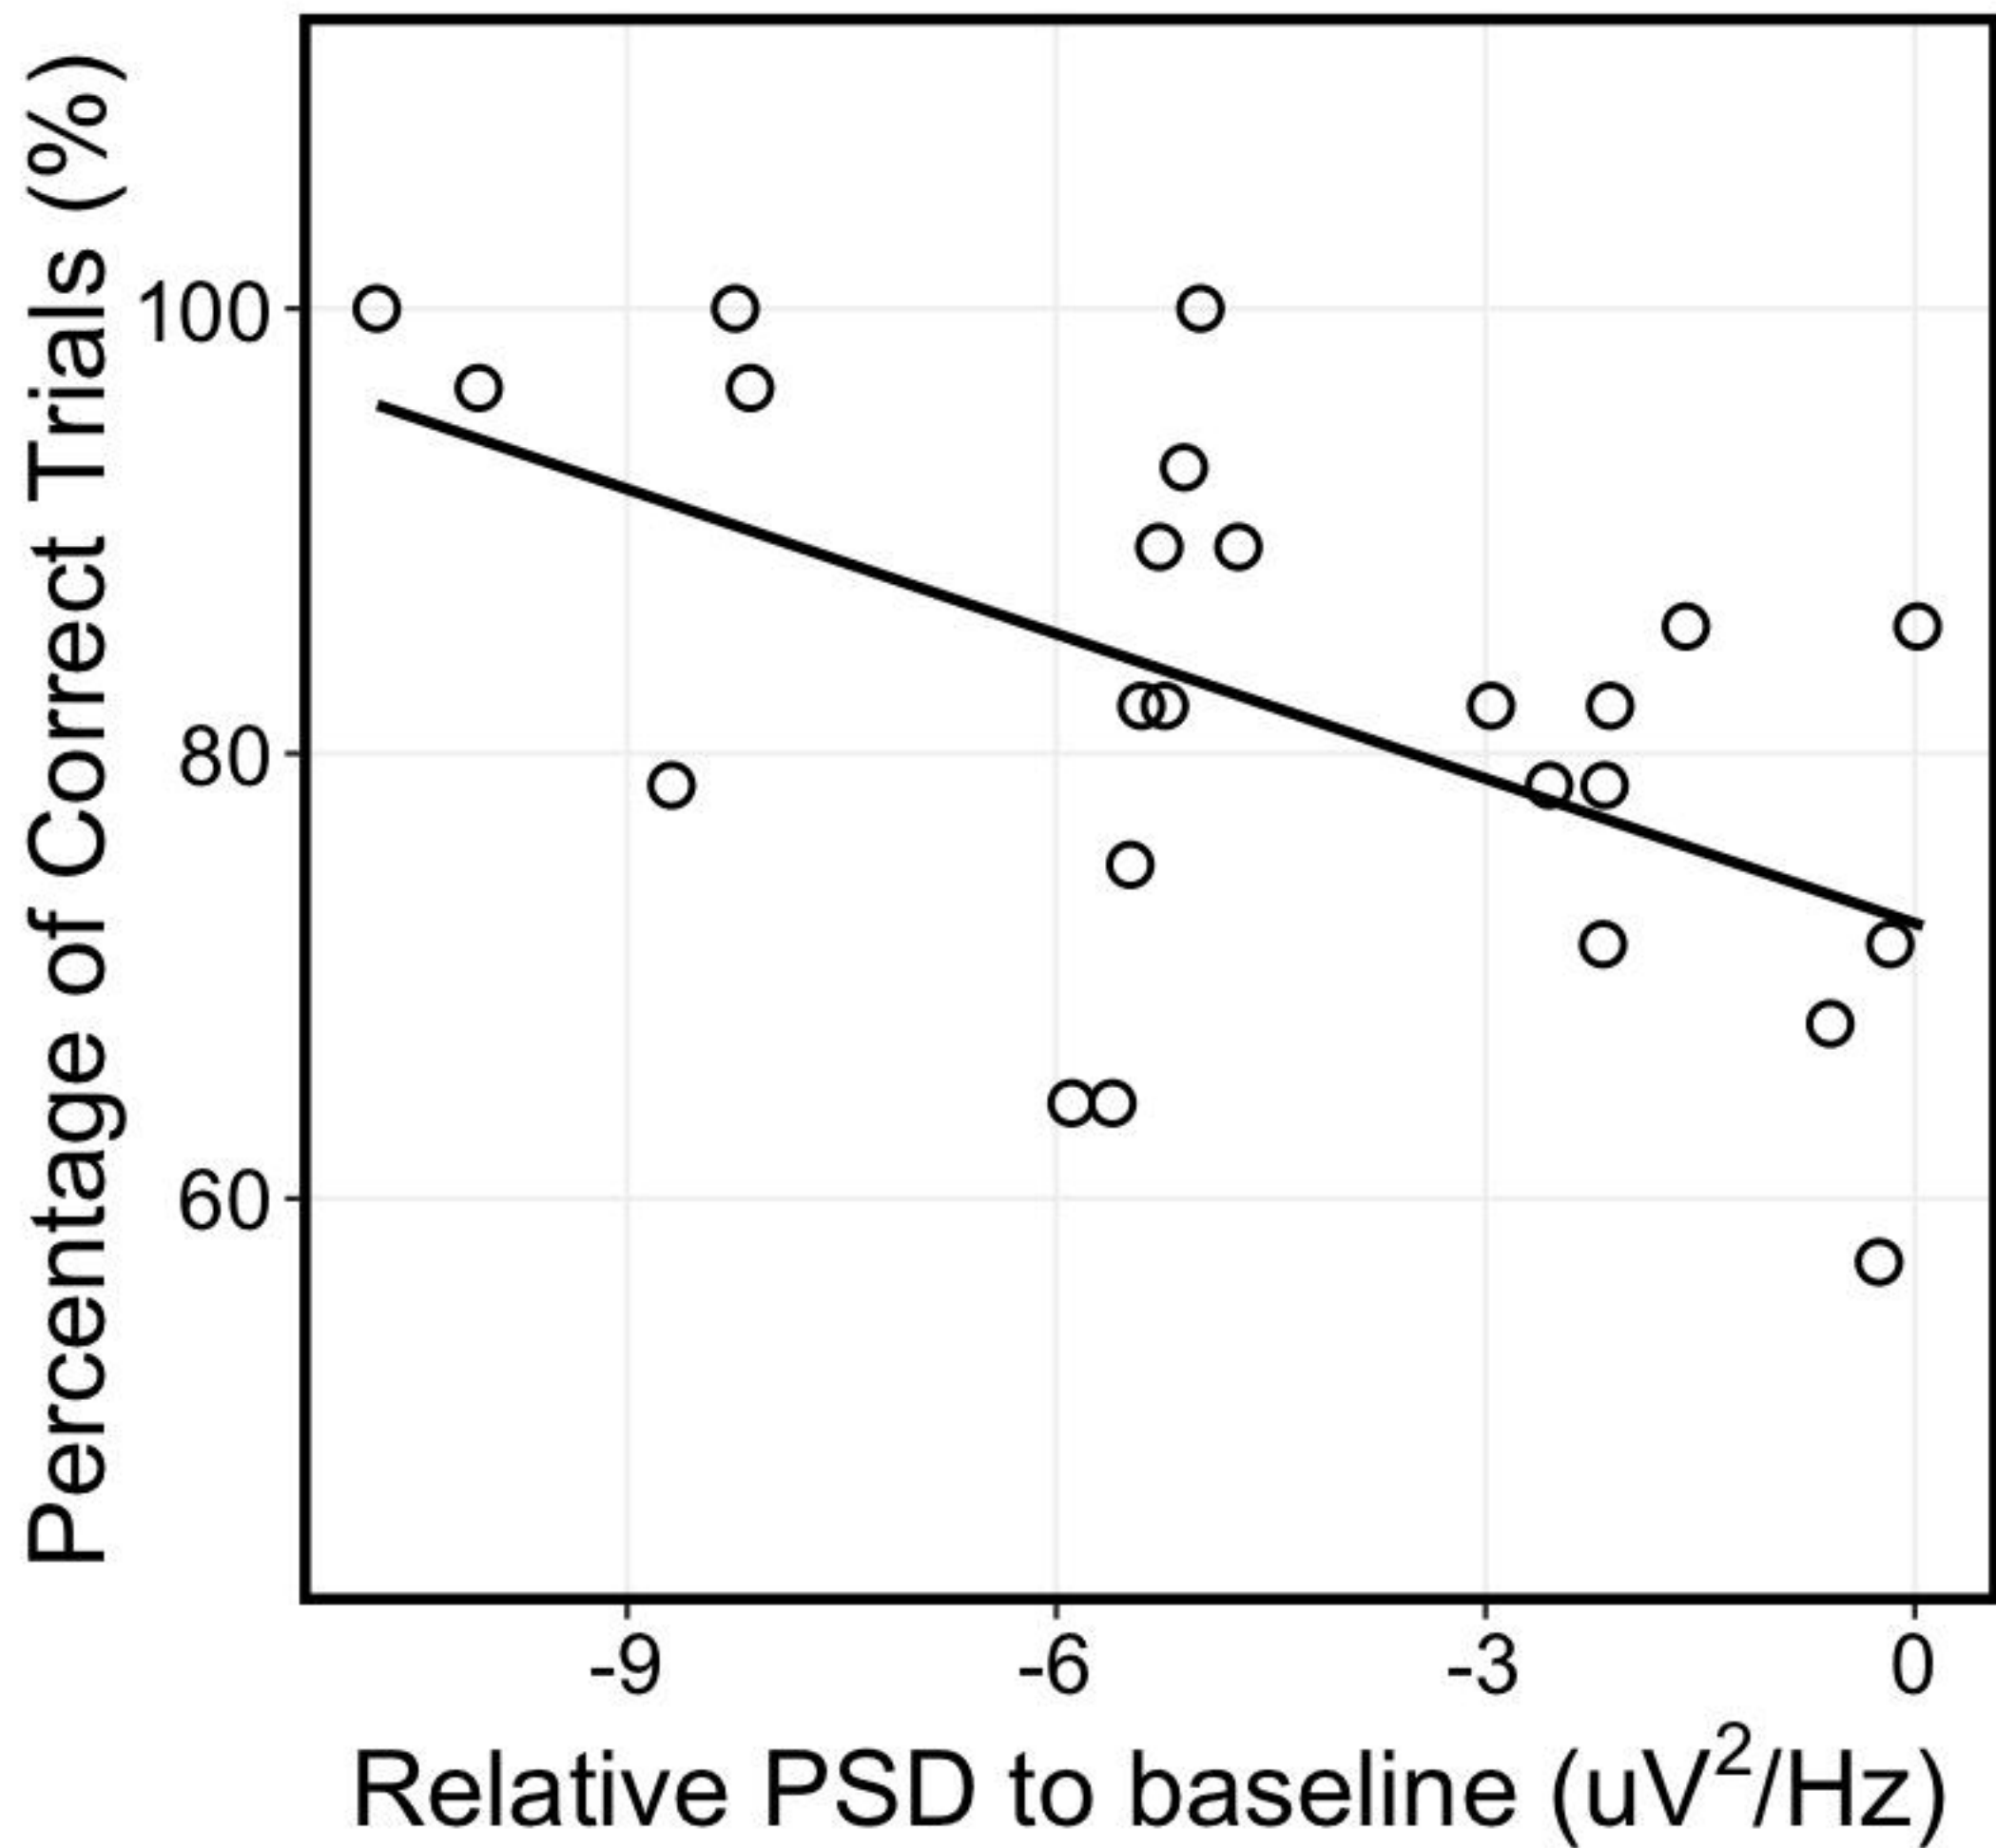



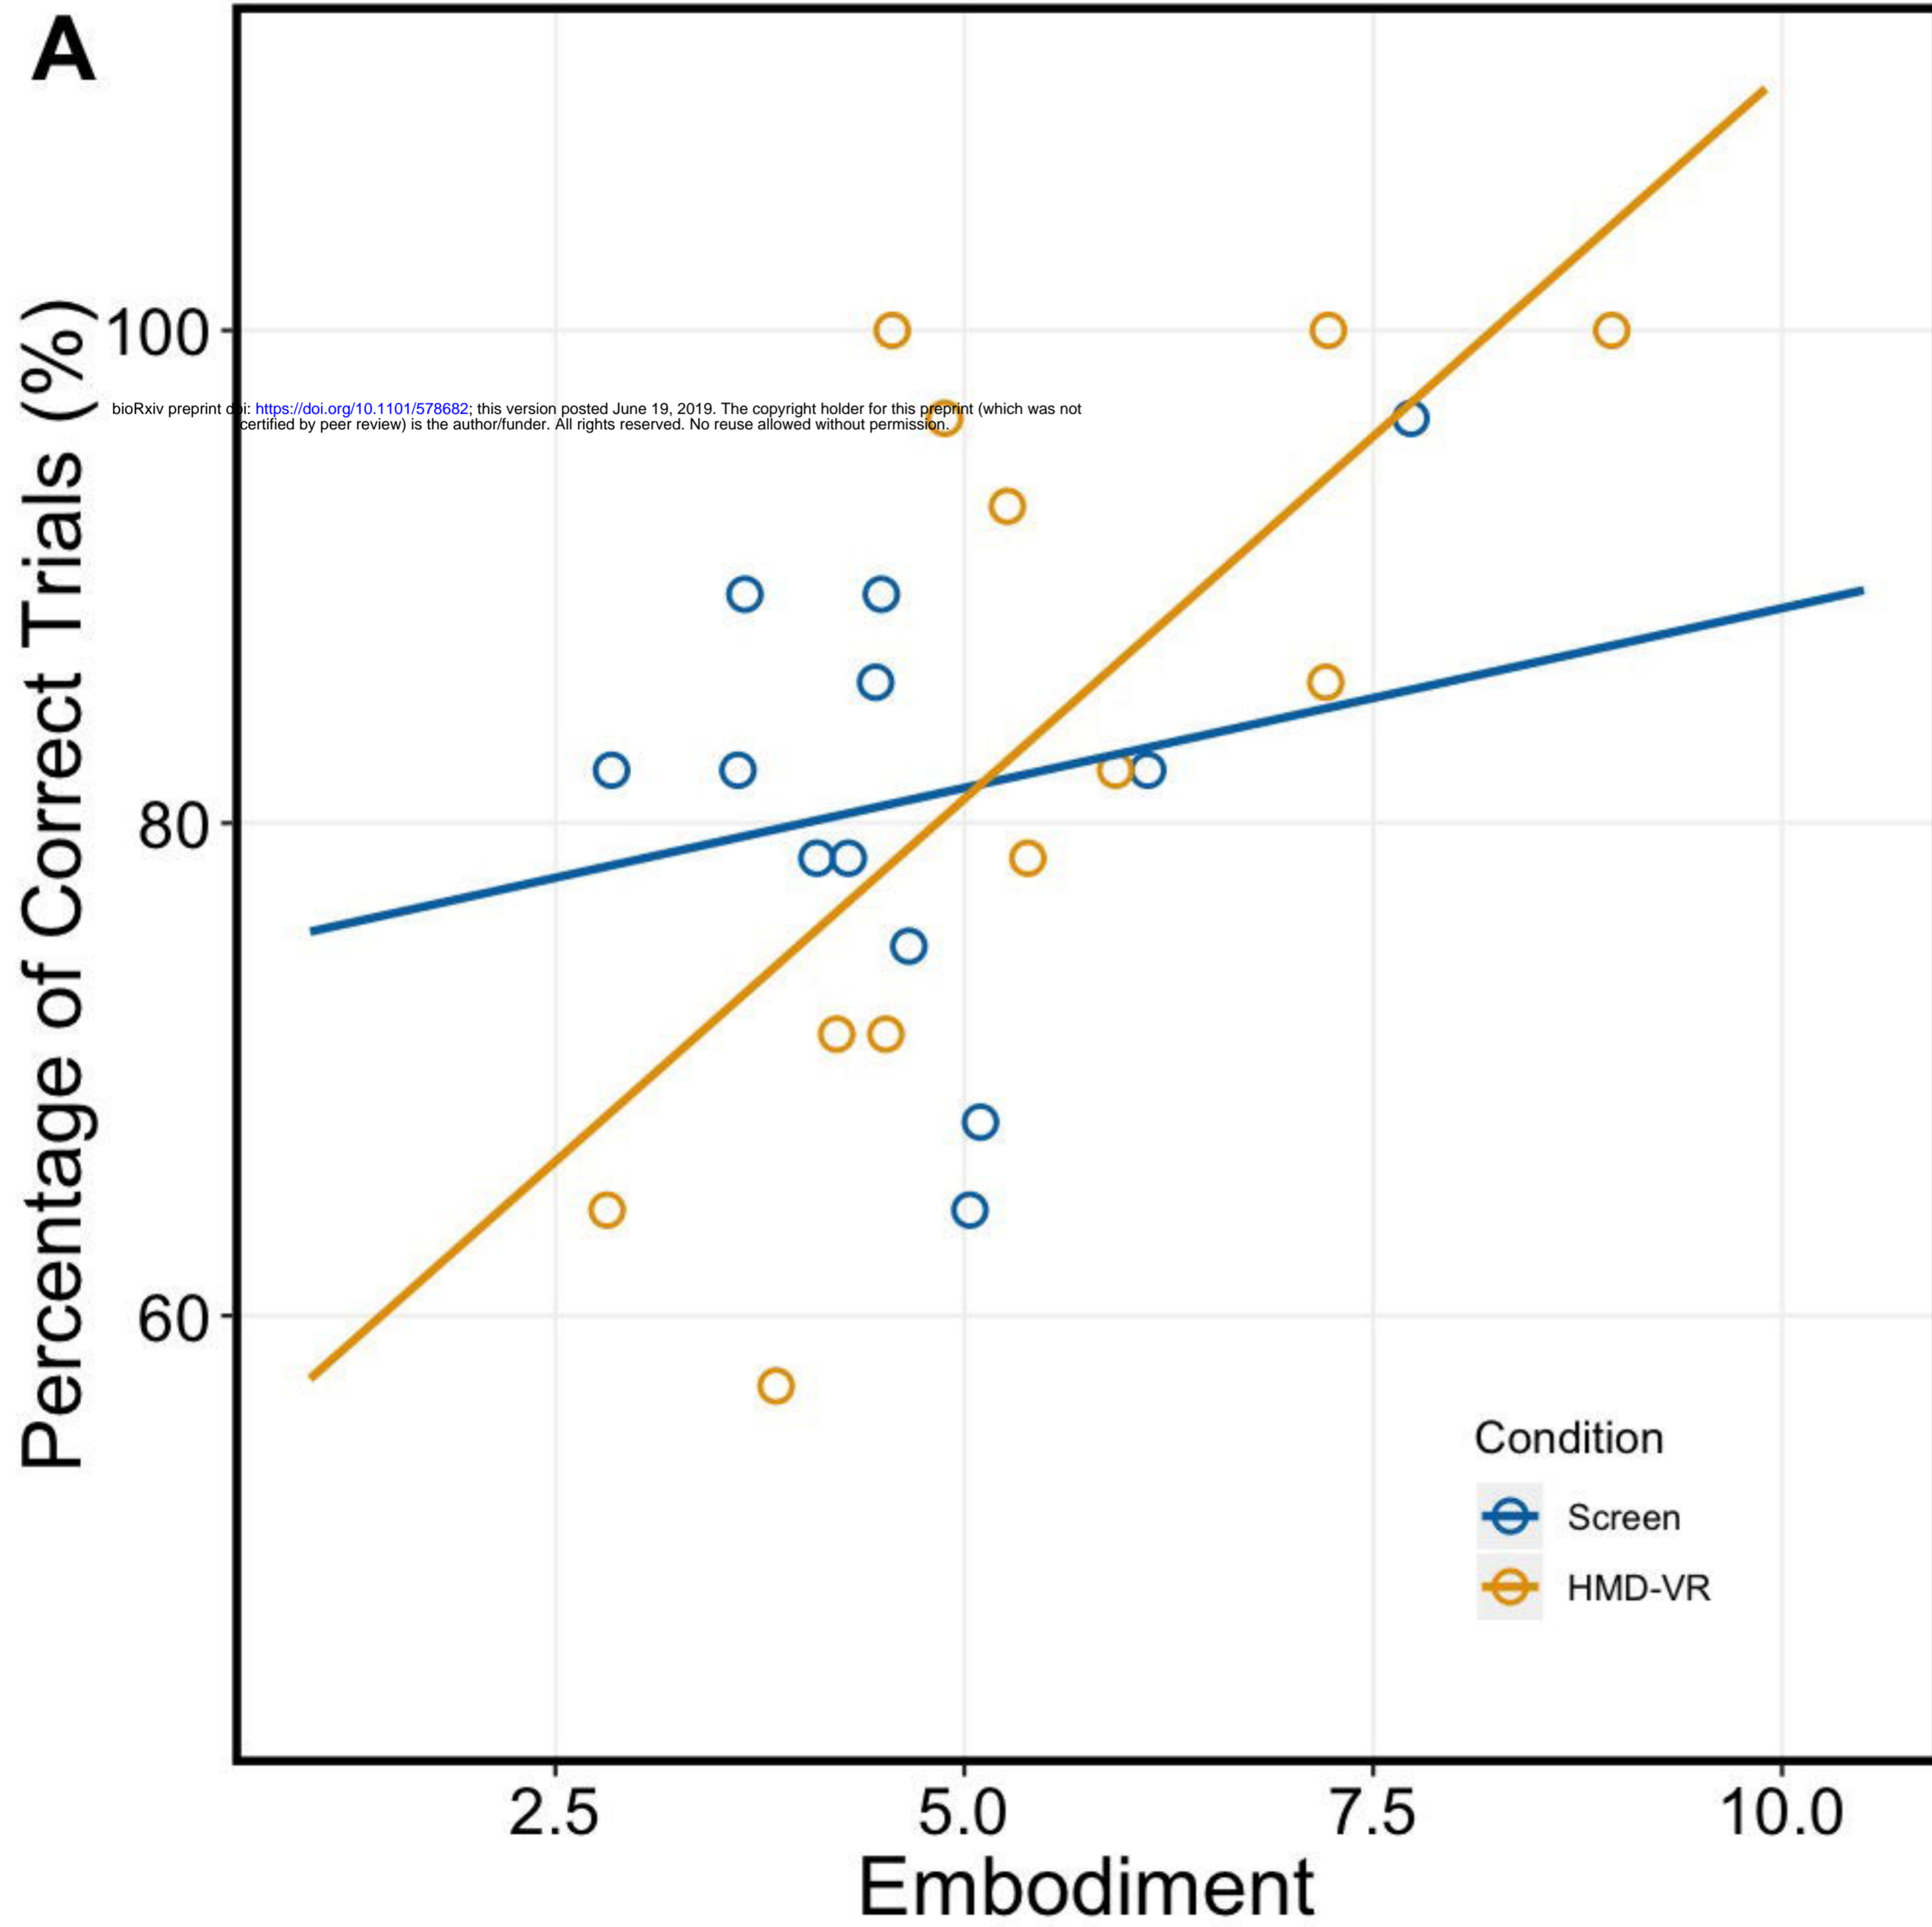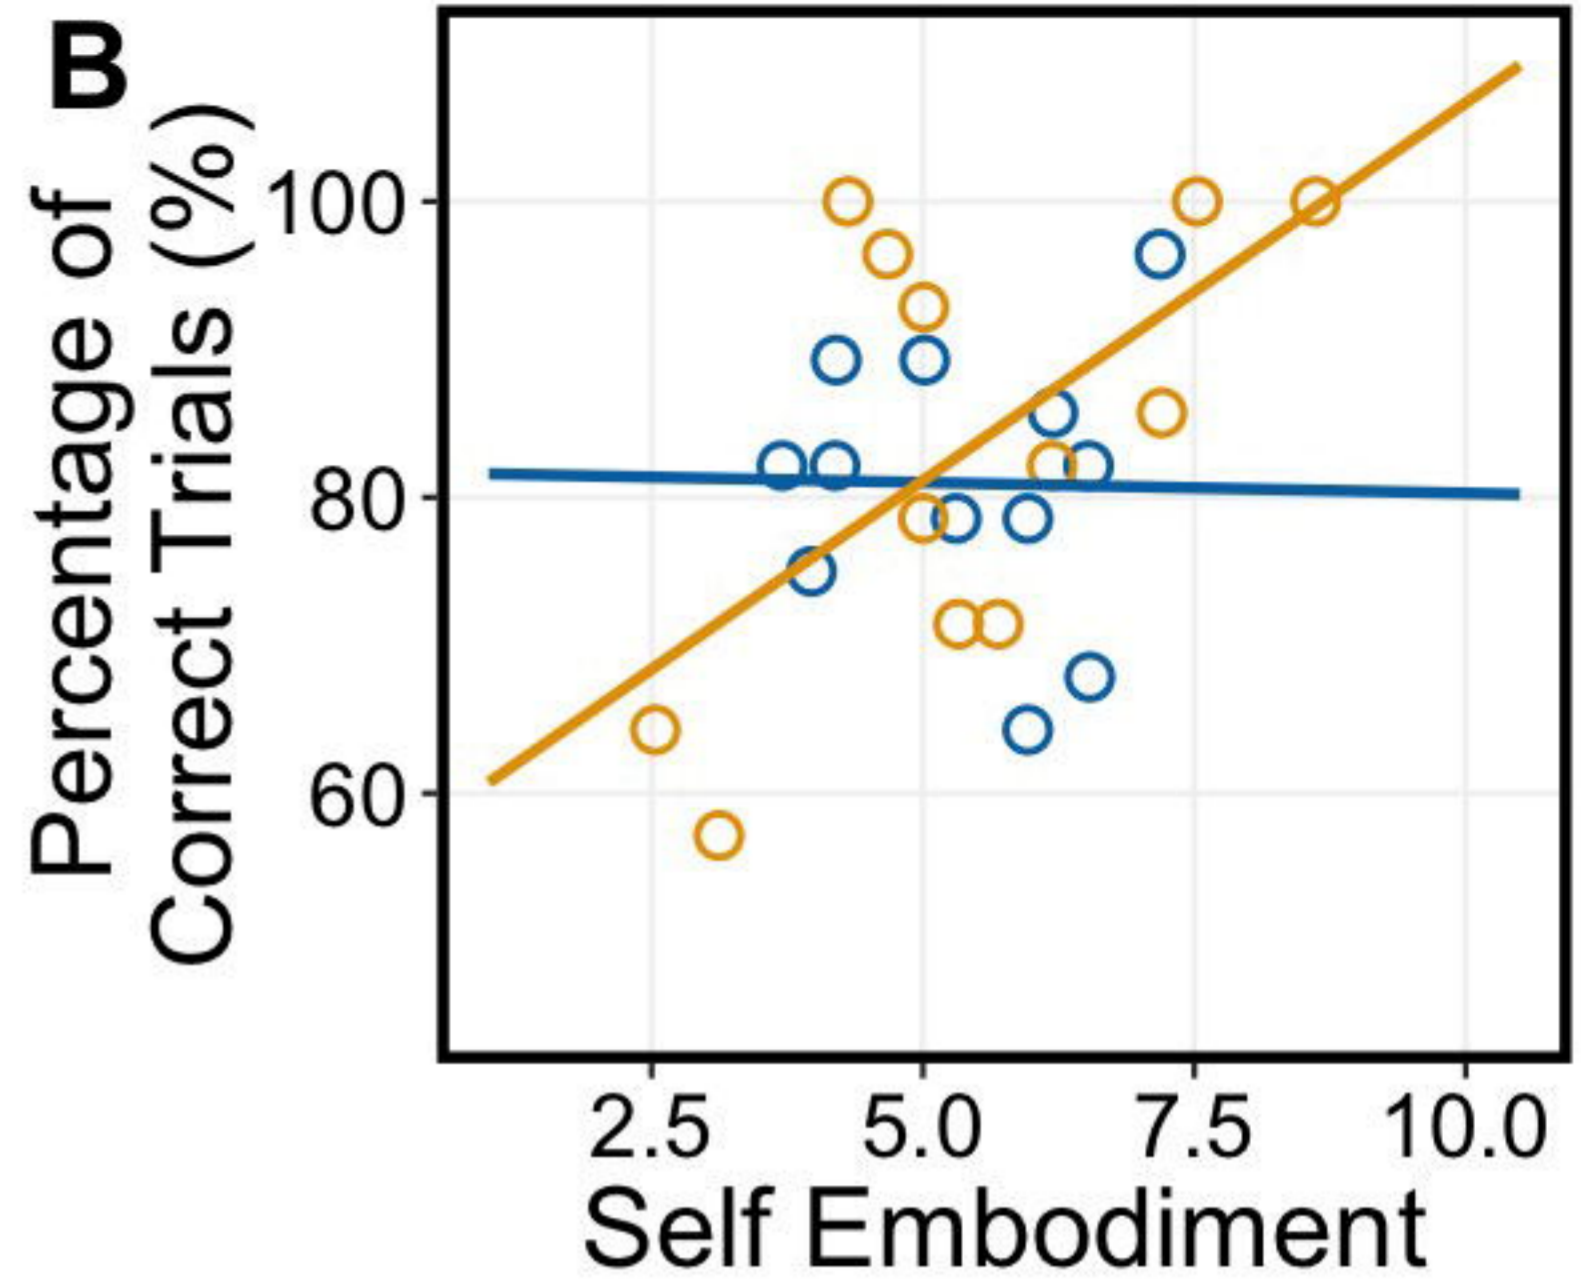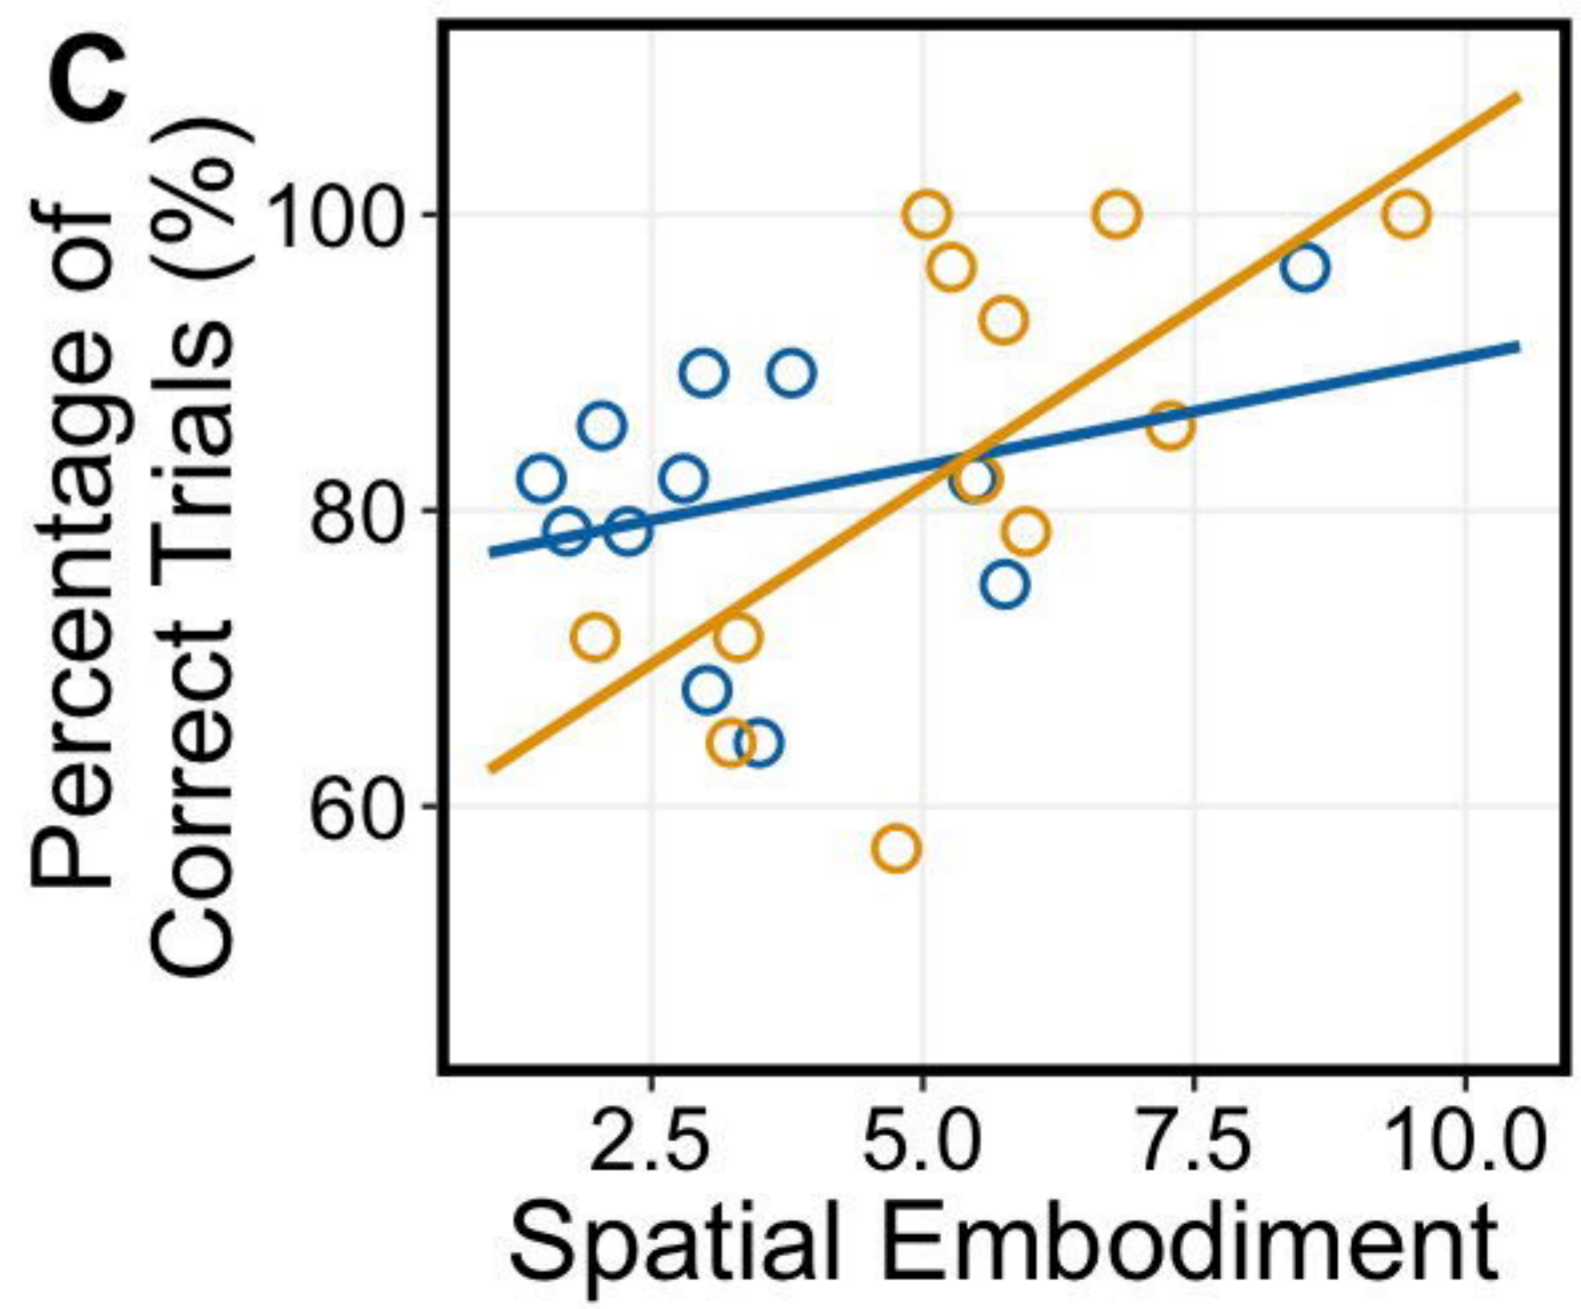

Source: https://www.biorxiv.org/content/biorxiv/early/2019/06/19/578682.full.pdf
